# Supplementary material for: Antimicrobial alkaloids produced by the mangrove endophyte Penicillium brocae MA-231 using the OSMAC approach
Source: Royal Society of Chemistry journal article supplement (doi:10.1039/c7ra12081h), 2017-01-01

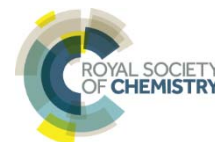

Journal Name

Supporting Information

## Antimicrobial alkaloids produced by the mangrove endophyte *Penicillium brocae* MA-231 using the OSMAC approach

Ling-Hong Meng, Xiao-Ming Li, Yang Liu, Gang-Ming Xu, and Bin-Gui Wang\*

### Content

- Fig S1. <sup>1</sup>H-NMR (500 MHz, DMSO-*d*<sub>6</sub>) spectrum of compound **1**
- Fig S2. <sup>13</sup>C-NMR (125 MHz, DMSO-*d*<sub>6</sub>) and DEPT spectra of compound **1**
- Fig S3. COSY spectrum of compound **1**
- Fig S4. HSQC spectrum of compound **1**
- Fig S5. HMBC spectrum of compound **1**
- Fig S6. CD spectrum of compound **1**
- Fig S7. <sup>1</sup>H NMR (500 MHz, CDCl<sub>3</sub>) spectrum of compound **2**
- Fig S8. <sup>13</sup>C NMR (125 MHz, CDCl<sub>3</sub>) and DEPT spectra of compound **2**
- Fig S9. COSY spectrum of compound **2**
- Fig S10. HSQC spectrum of compound **2**
- Fig S11. HMBC spectrum of compound **2**
- Fig S12. CD spectrum of compound **2**
- Fig S13. <sup>1</sup>H NMR (500 MHz, DMSO-*d*<sub>6</sub>) spectrum of compound **3**
- Fig S14. <sup>13</sup>C NMR (125 MHz, DMSO-*d*<sub>6</sub>) and DEPT spectra of compound **3**
- Fig S15. COSY spectrum of compound **3**
- Fig S16. HSQC spectrum of compound **3**
- Fig S17. HMBC spectrum of compound **3**
- Fig S18. NOESY spectrum of compound **3**
- Fig S19. ECD spectrum of compound **3**
- Fig S20. <sup>1</sup>H NMR (500 MHz, DMSO-*d*<sub>6</sub>) spectrum of compound **4**
- Fig S21. <sup>13</sup>C NMR (125 MHz, DMSO-*d*<sub>6</sub>) and DEPT spectra of compound **4**
- Fig S22. COSY spectrum of compound **4**
- Fig S23. HSQC spectrum of compound **4**
- Fig S24. HMBC spectrum of compound **4**
- Fig S25. NOESY spectrum of compound **4**
- Fig S26. CD spectrum of compound **4**
- Fig S27. <sup>1</sup>H NMR (500 MHz, DMSO-*d*<sub>6</sub>) spectrum of compound **7**
- Fig S28. <sup>13</sup>C NMR (125 MHz, DMSO-*d*<sub>6</sub>) and DEPT spectra of compound **7**
- Fig S29. COSY spectrum of compound **7**
- Fig S30. HSQC spectrum of compound **7**
- Fig S31. HMBC spectrum of compound **7**
- Fig S32. NOESY spectrum of compound **7**
- Fig S33. <sup>1</sup>H NMR (500 MHz, DMSO-*d*<sub>6</sub>) spectrum of compound **8**
- Fig S34. <sup>13</sup>C NMR (125 MHz, DMSO-*d*<sub>6</sub>) and DEPT spectra of compound **8**
- Fig S35. COSY spectrum of compound **8**
- Fig S36. HSQC spectrum of compound **8**
- Fig S37. HMBC spectrum of compound **8**
- Fig S38. NOESY spectrum of compound **8**
- Fig S39. <sup>1</sup>H NMR (500 MHz, CDCl<sub>3</sub>) spectrum of compound **10**
- Fig S40. <sup>13</sup>C NMR (125 MHz, CDCl<sub>3</sub>) and DEPT spectra of compound **10**
- Fig S41. COSY spectrum of compound **10**
- Fig S42. HSQC spectrum of compound **10**
- Fig S43. HMBC spectrum of compound **10**

Fig S44. NOESY spectrum of compound **10**

Fig S45. Crystal packing of compound **1** at 293(2) K

Fig S46. Crystal packing of compound **2** at 293(2) K

Fig S47. Crystal packing of compound **7** at 293(2) K

Fig S48. Crystal packing of compound **8** at 293(2) K

Fig S1.  $^1\text{H}$  NMR (500 MHz,  $\text{DMSO-}d_6$ ) spectrum of compound **1**.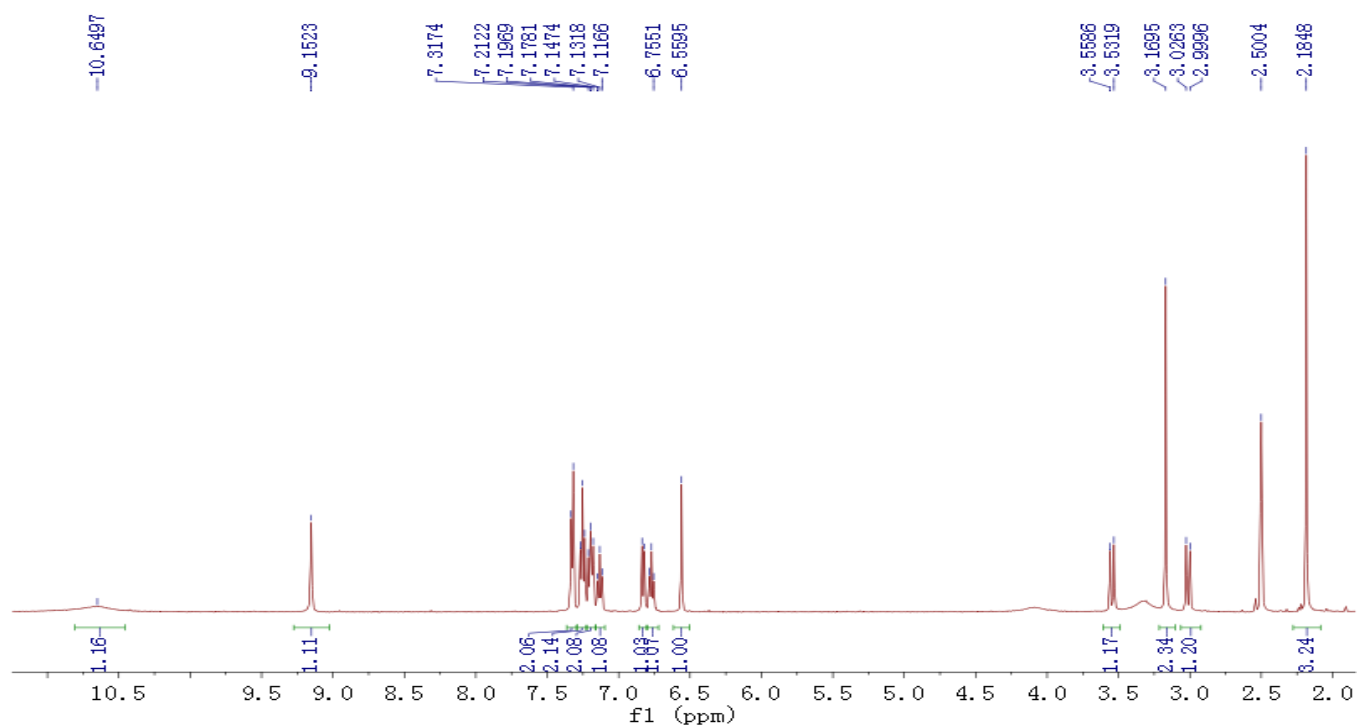Fig S2.  $^{13}\text{C}$  NMR (125 MHz,  $\text{DMSO-}d_6$ ) and DEPT spectra of compound **1**.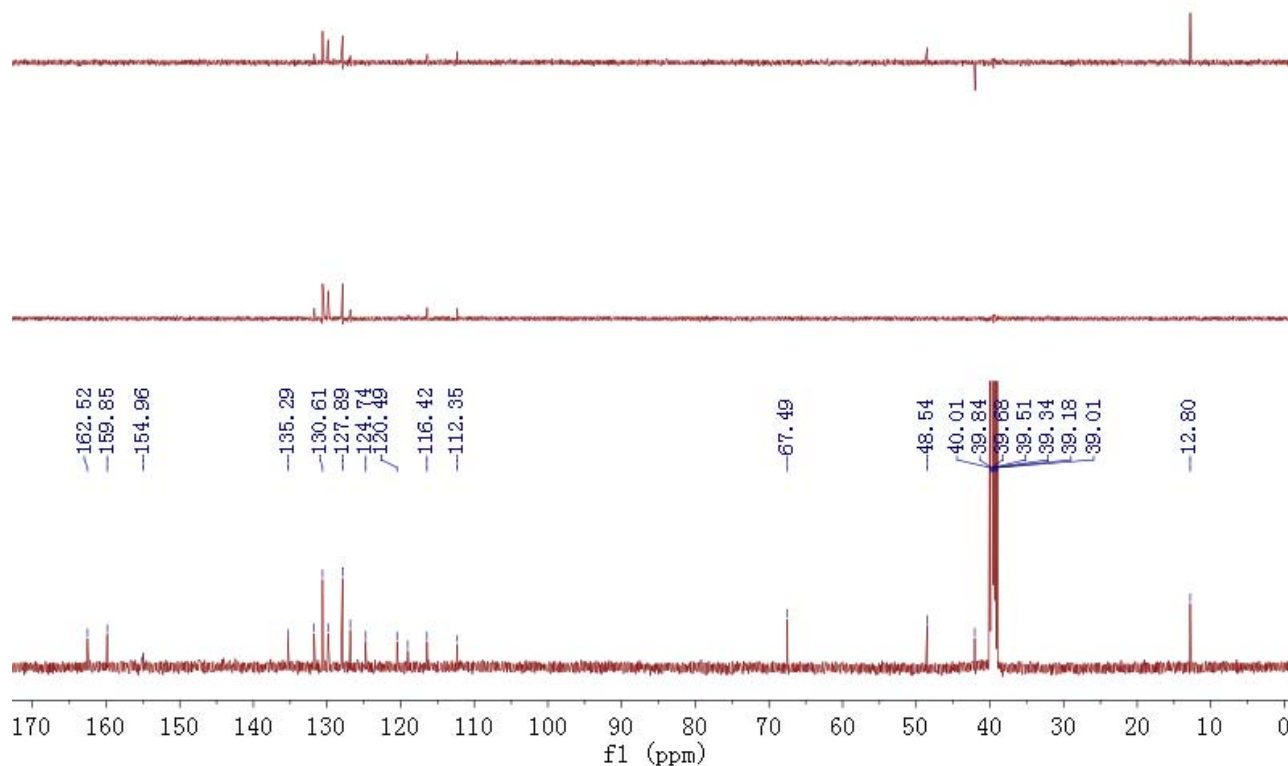

Fig S3. COSY spectrum of compound **1**.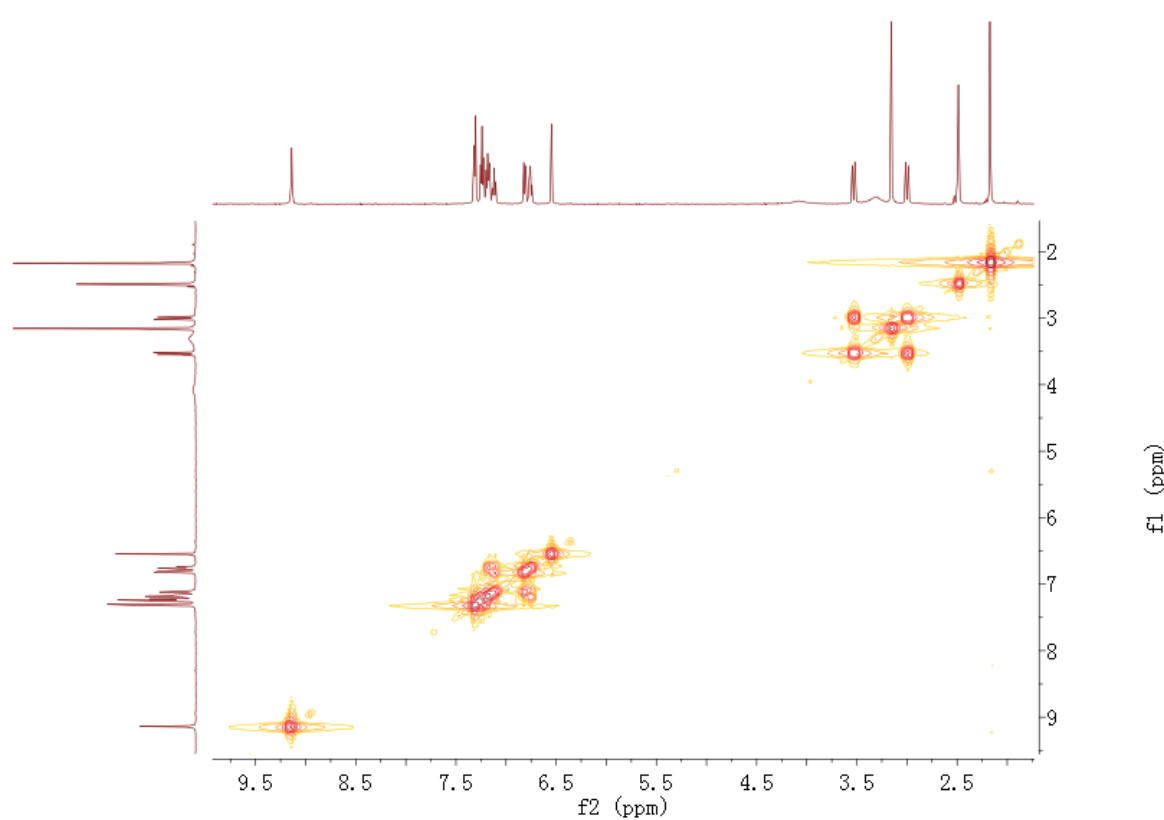Fig S4. HSQC spectrum of compound **1**.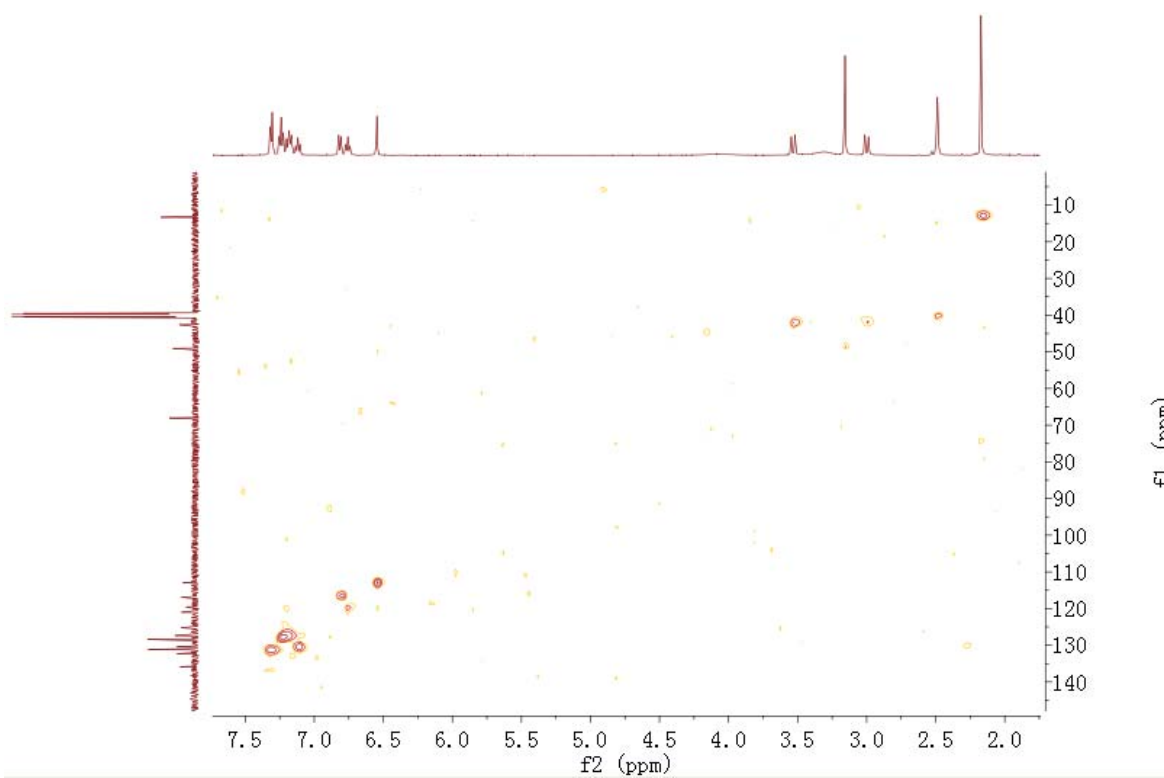

Fig S5. HMBC spectrum of compound **1**.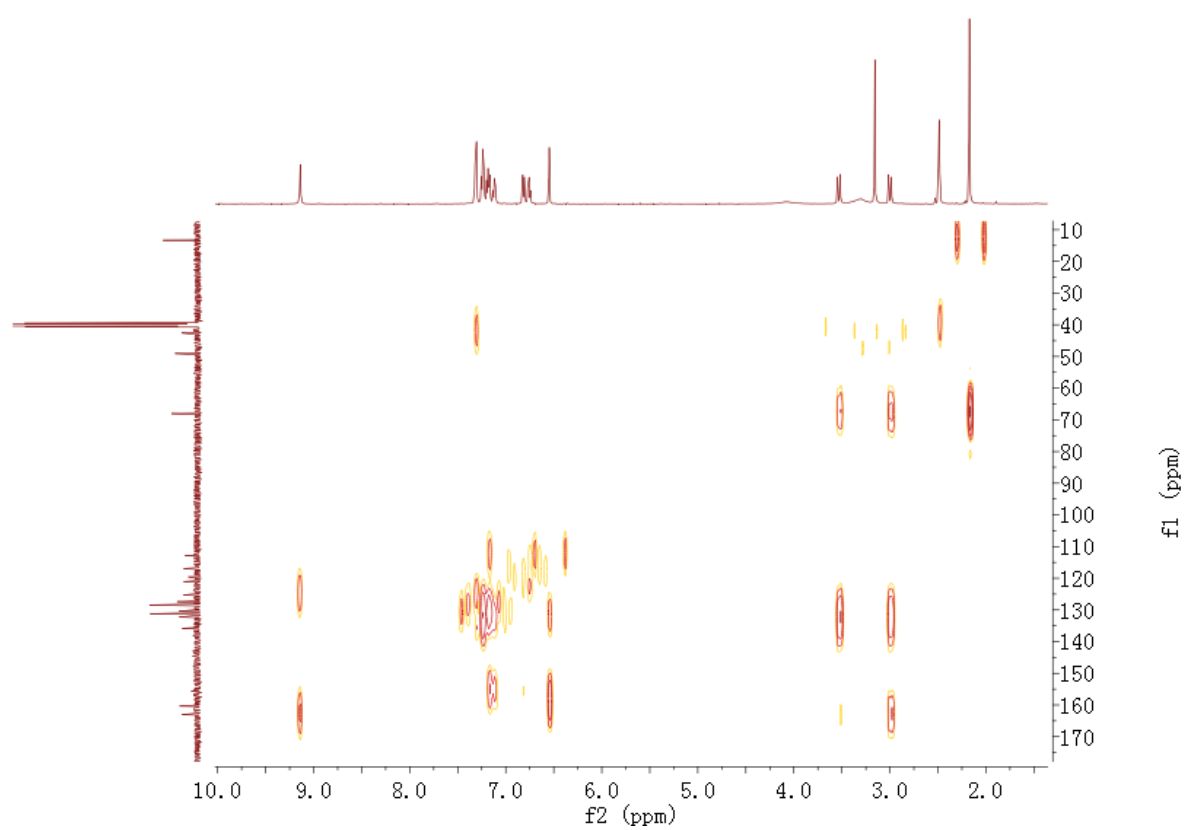Fig S6. CD spectrum of compound **1**.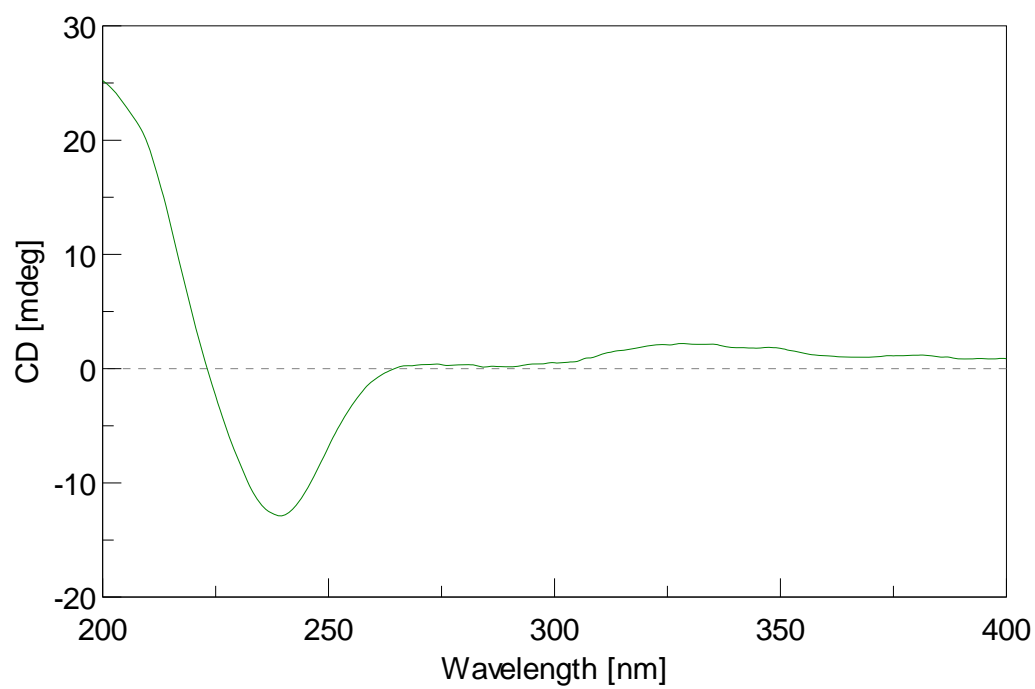

Fig S7.  $^1\text{H}$  NMR (500 MHz,  $\text{CDCl}_3$ ) spectrum of compound **2**.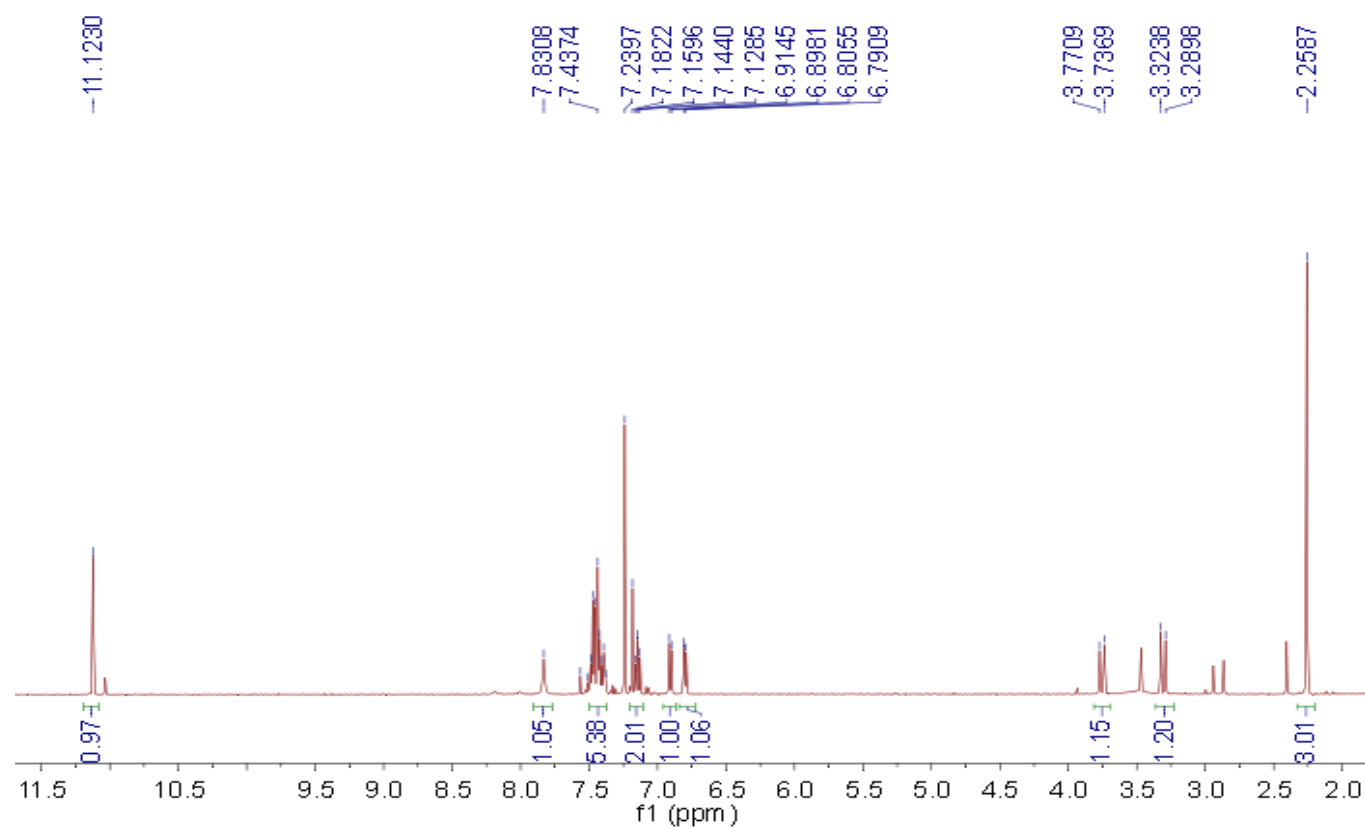Fig S8.  $^{13}\text{C}$  NMR (125 MHz,  $\text{CDCl}_3$ ) and DEPT spectra of compound **2**.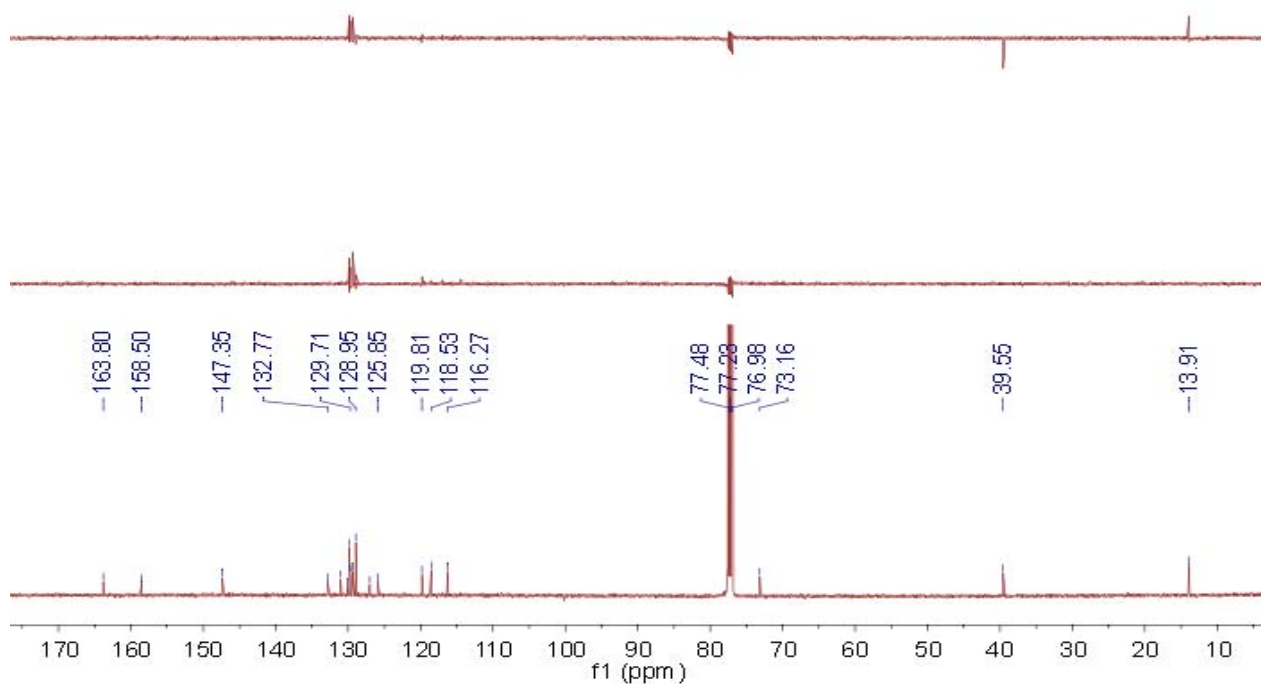

Fig S9. COSY spectrum of compound **2**.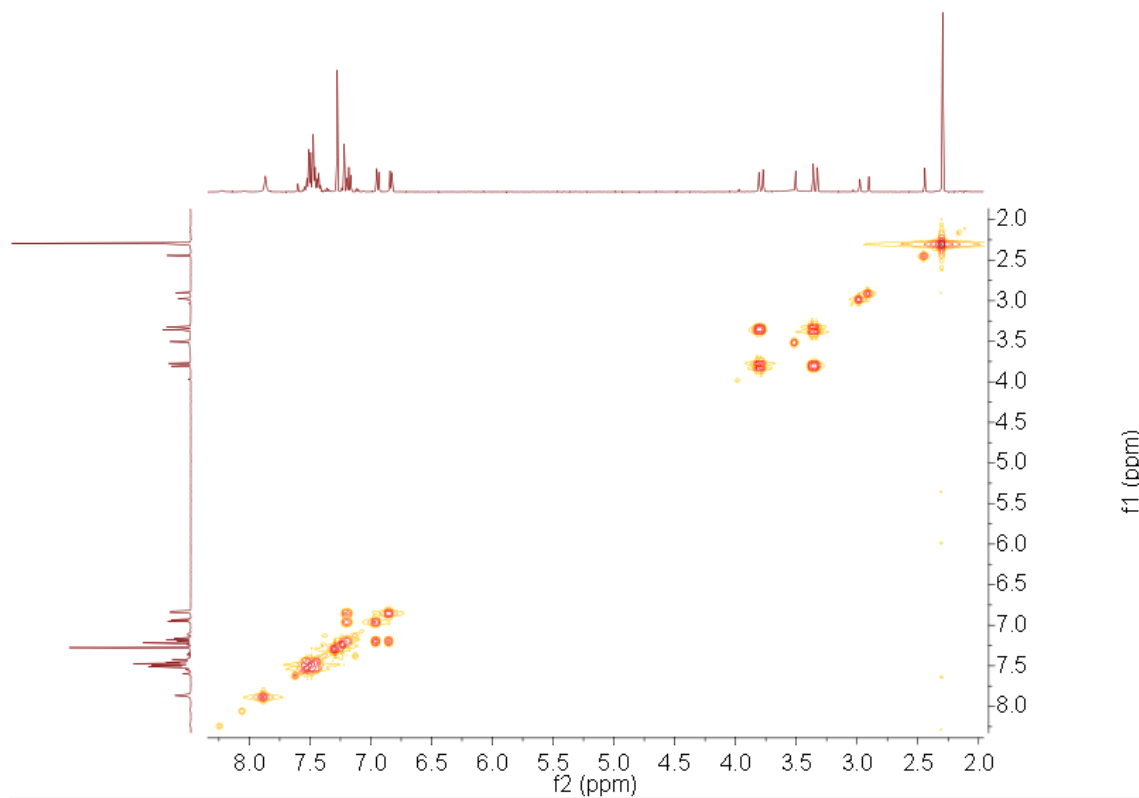Fig S10. HSQC spectrum of compound **2**.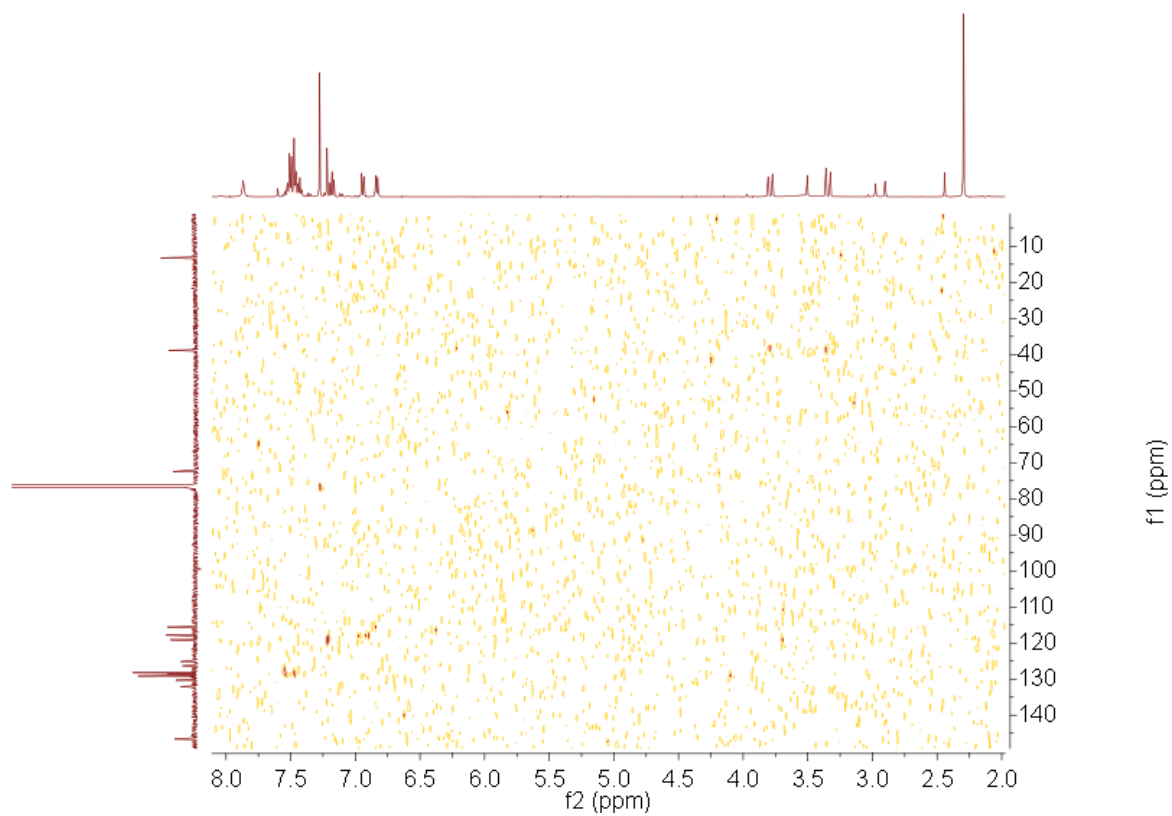

Fig S11. HMBC spectrum of compound **2**.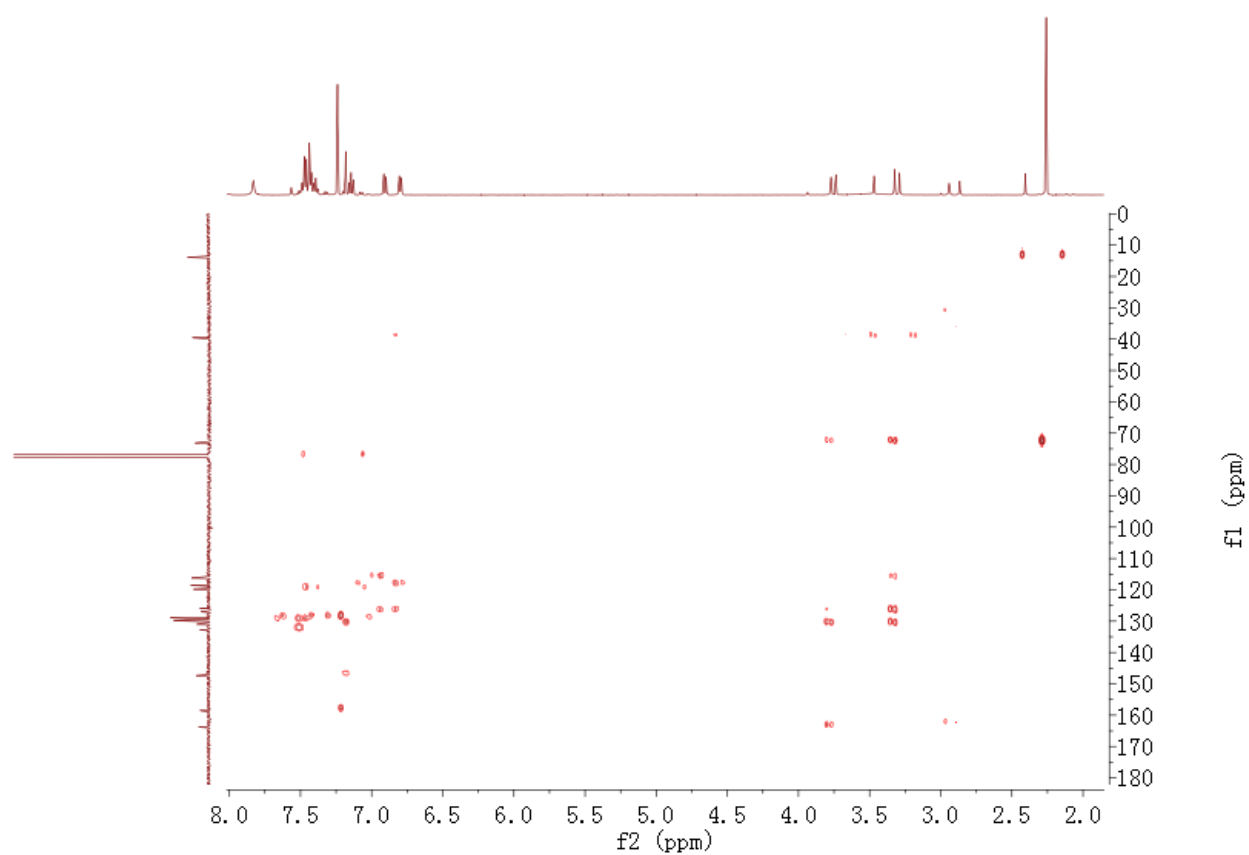Fig S12. CD spectrum of compound **2**.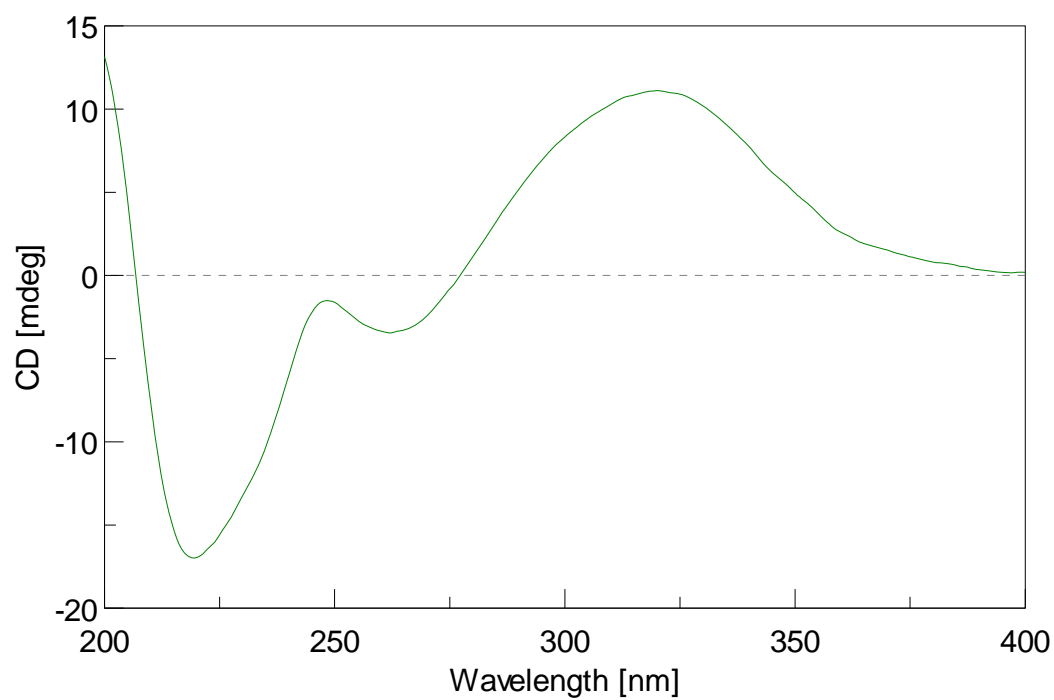



Fig S13.  $^1\text{H}$  NMR (500 MHz,  $\text{DMSO-}d_6$ ) spectrum of compound **3**.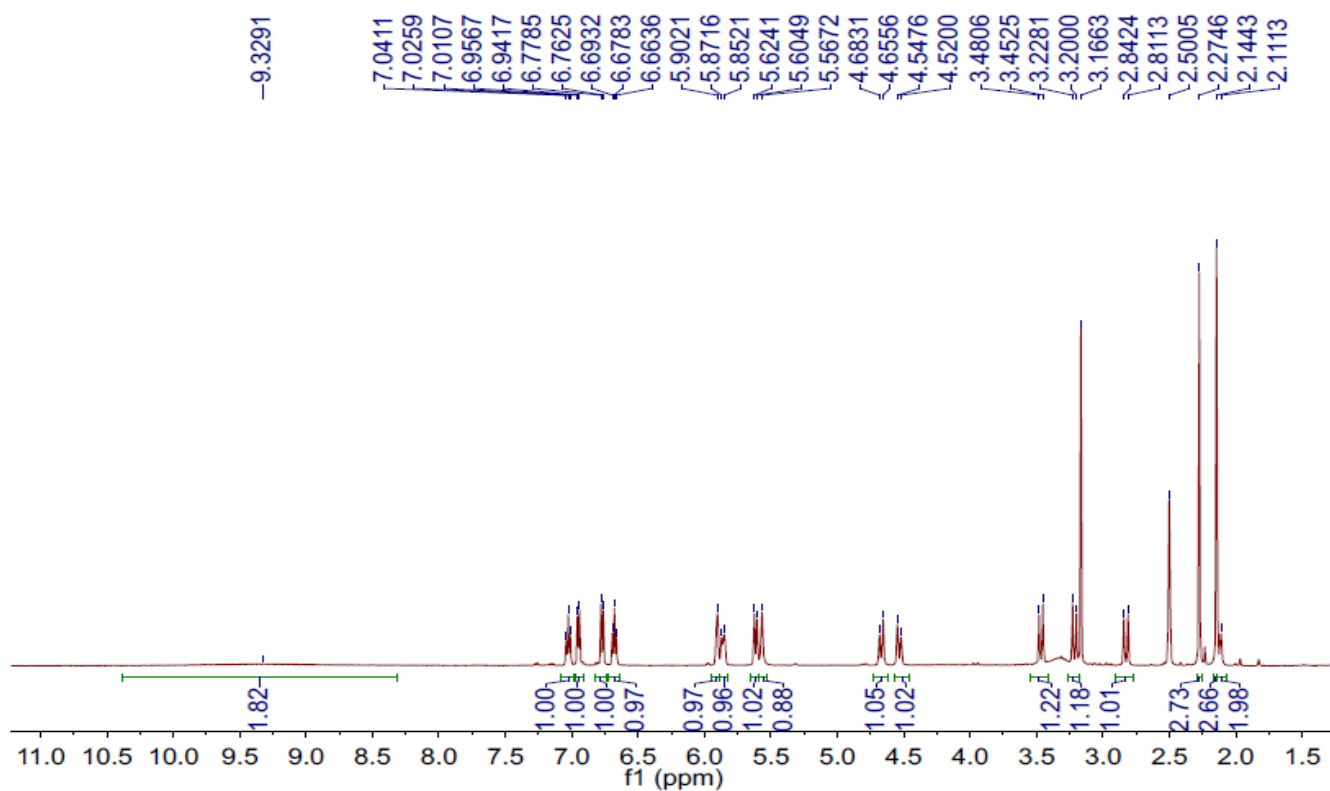Fig S14.  $^{13}\text{C}$  NMR (125 MHz,  $\text{DMSO-}d_6$ ) and DEPT spectra of compound **3**.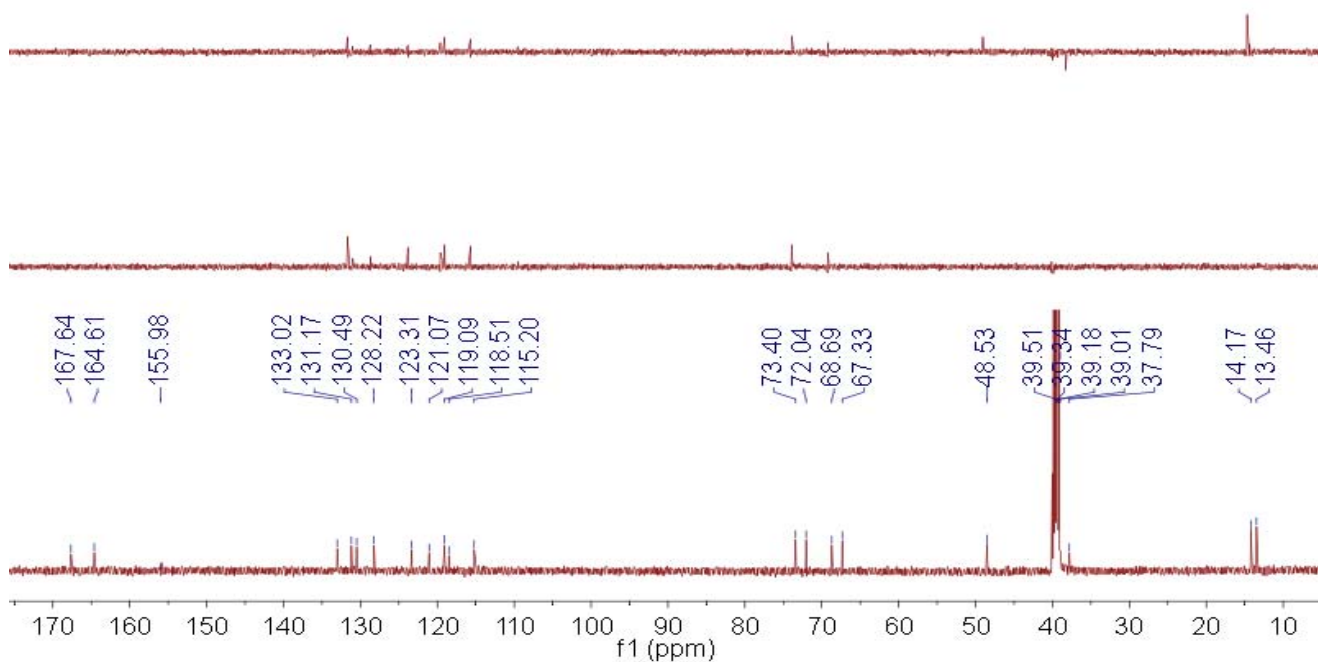

Fig S15. COSY spectrum of compound **3**.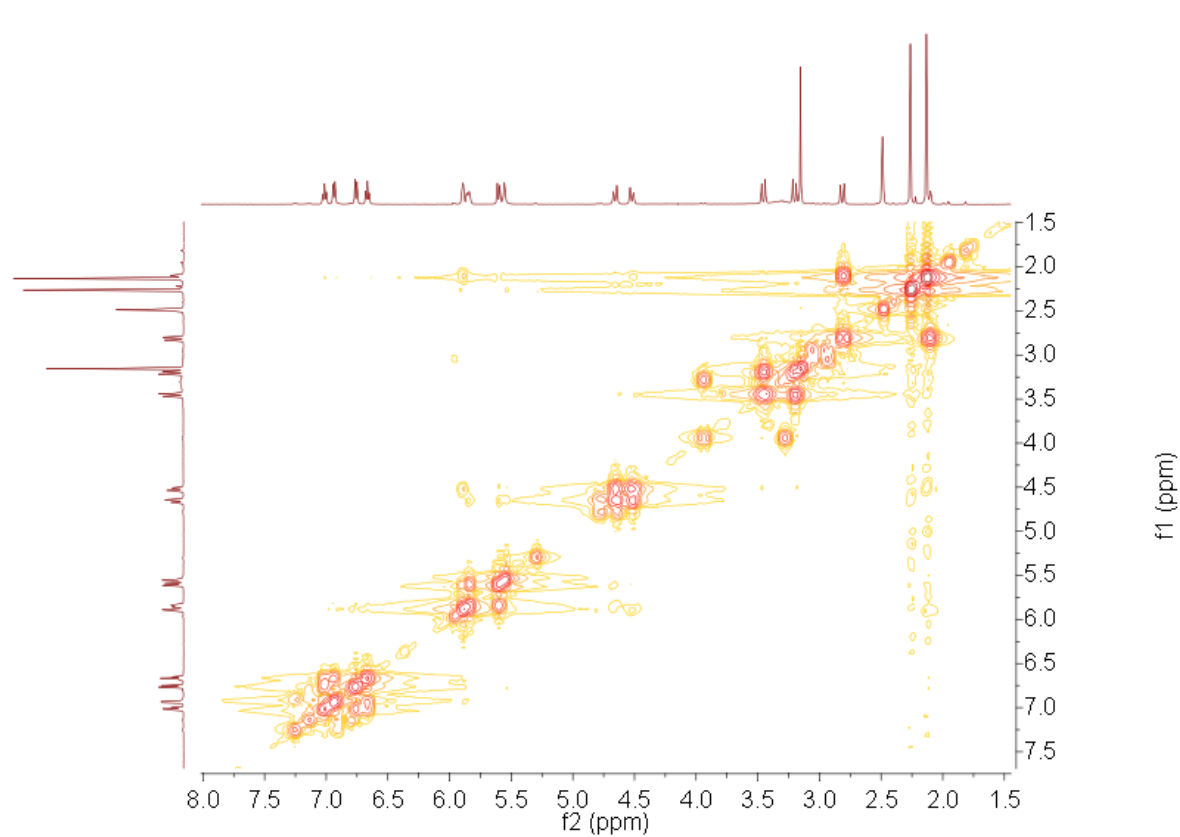Fig S16. HSQC spectrum of compound **3**.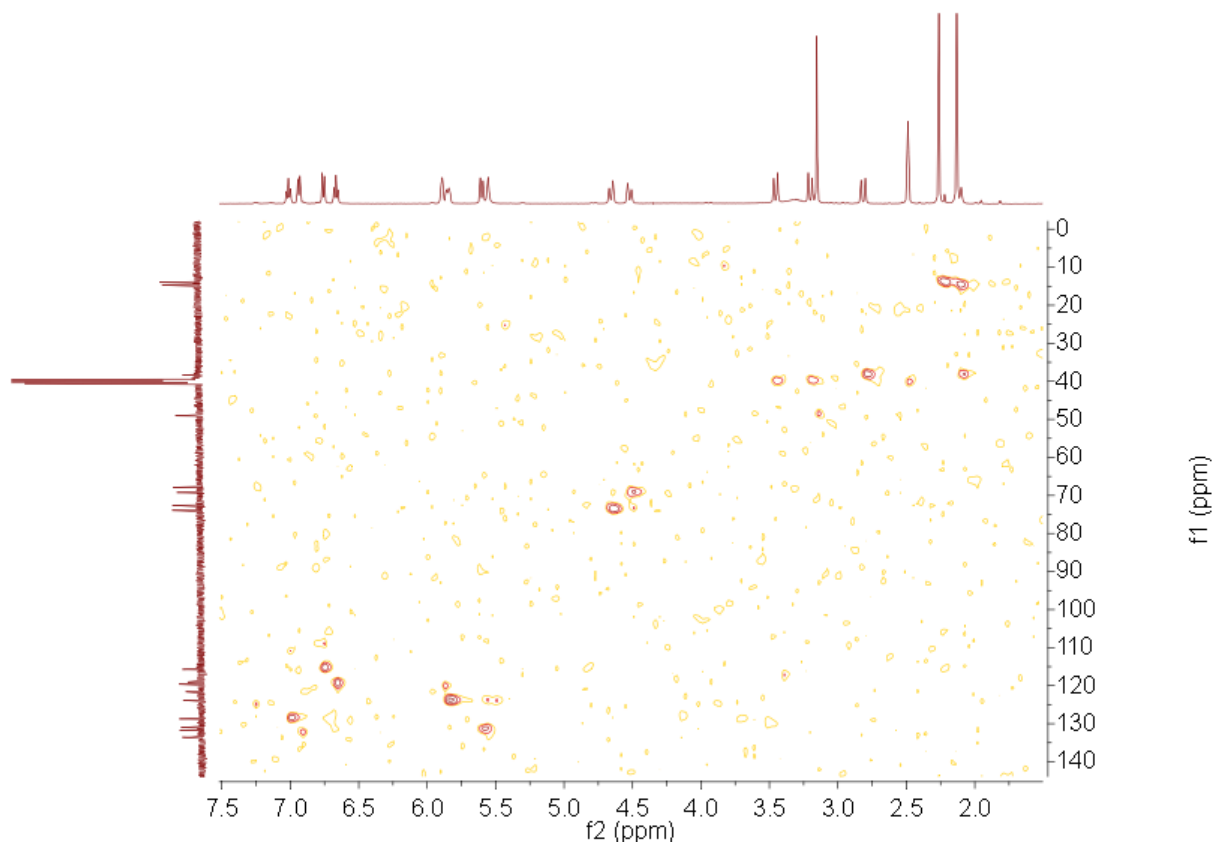

Fig S17. HMBC spectrum of compound **3**.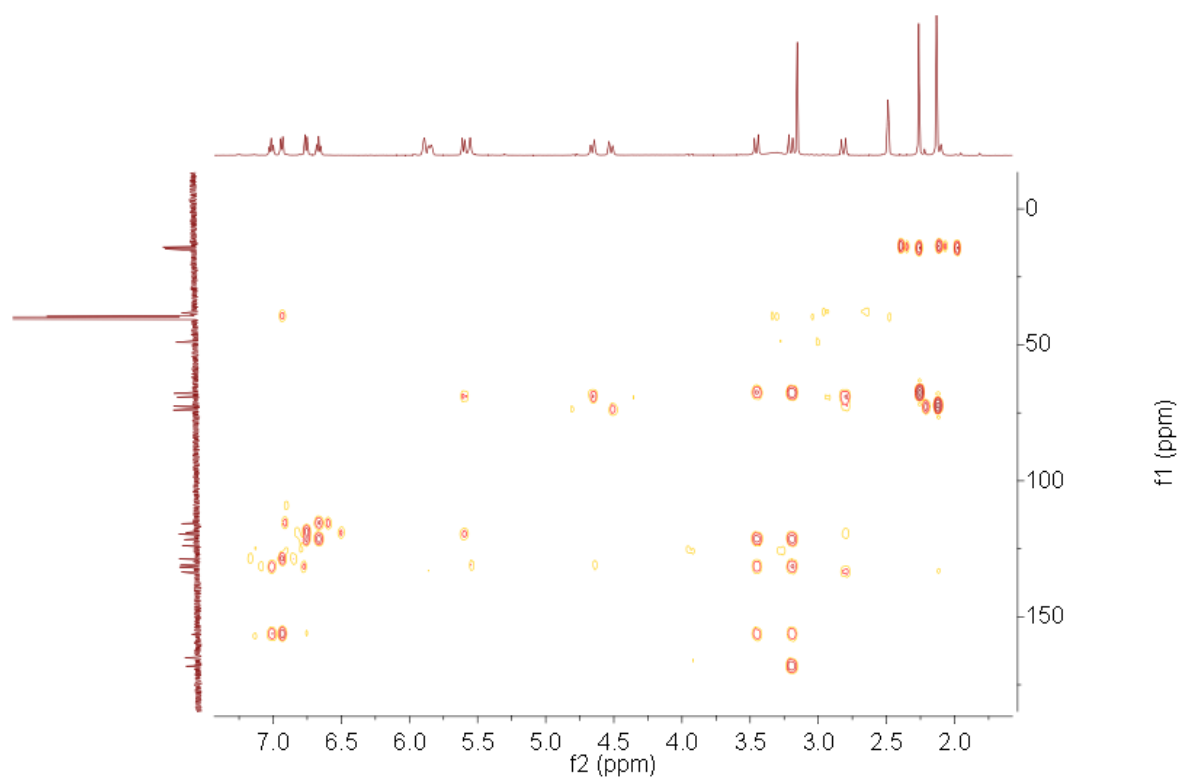Fig S18. NOESY spectrum of compound **3**.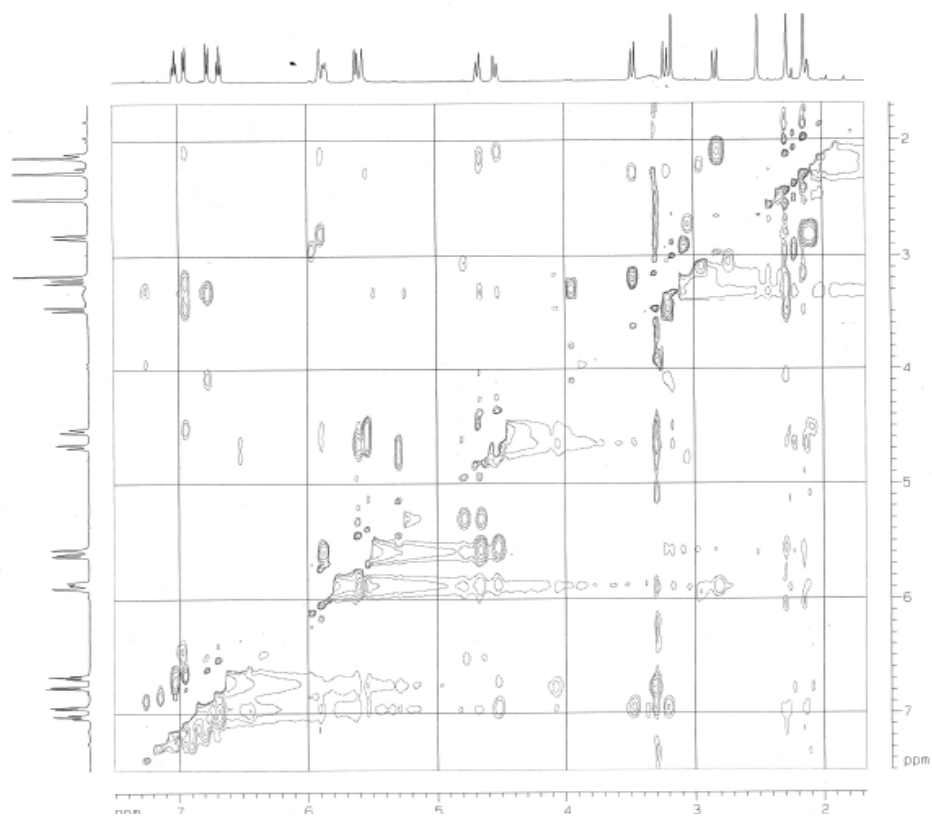

Fig S19. CD spectrum of compound **3**.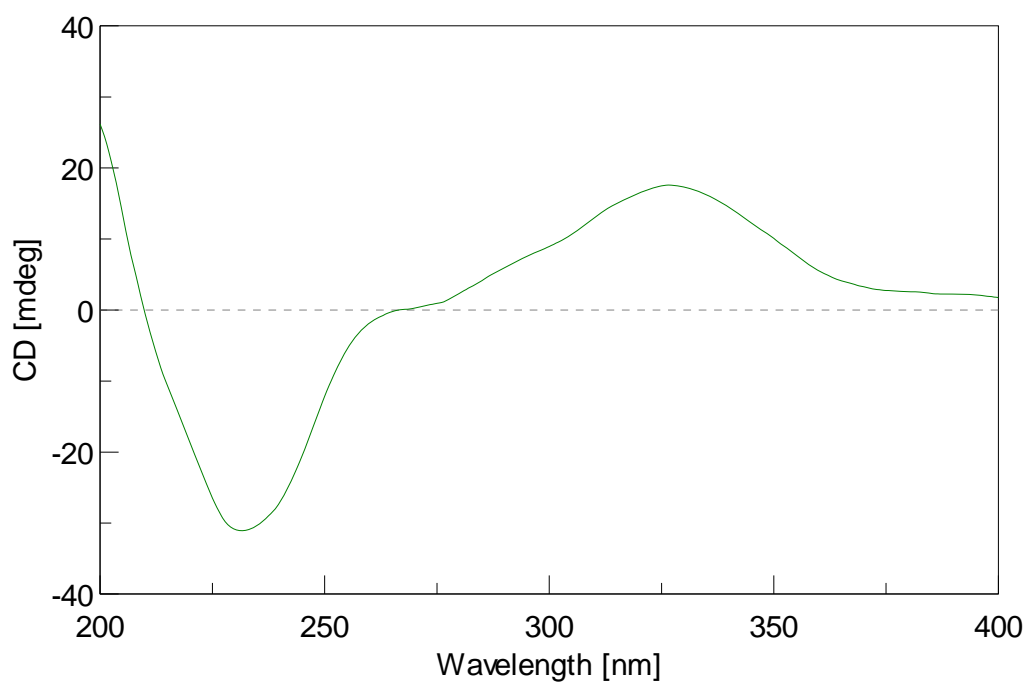Fig S20.  $^1\text{H}$  NMR (500 MHz,  $\text{DMSO-}d_6$ ) spectrum of compound **4**.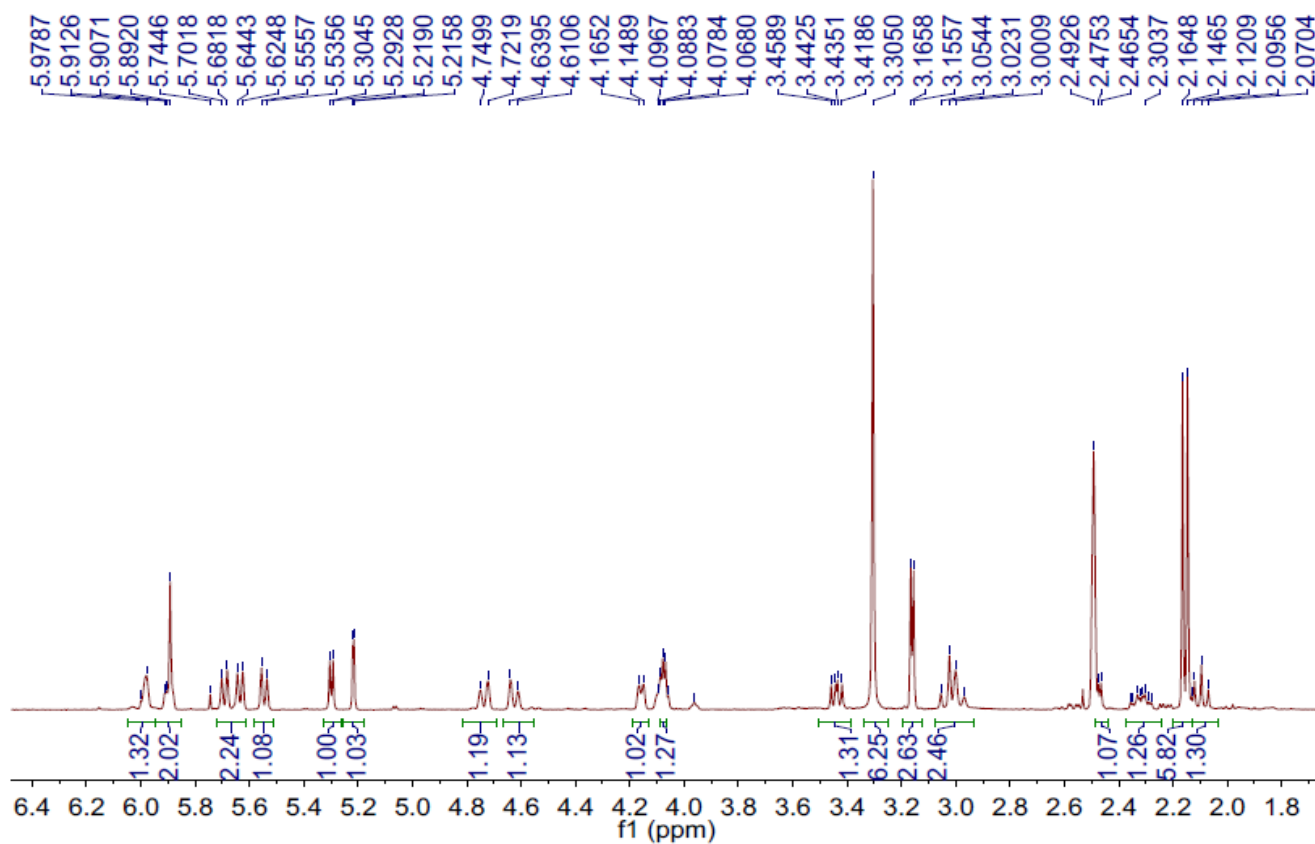

Fig S21.  $^{13}\text{C}$  NMR (125 MHz,  $\text{DMSO-}d_6$ ) and DEPT spectra of compound **4**.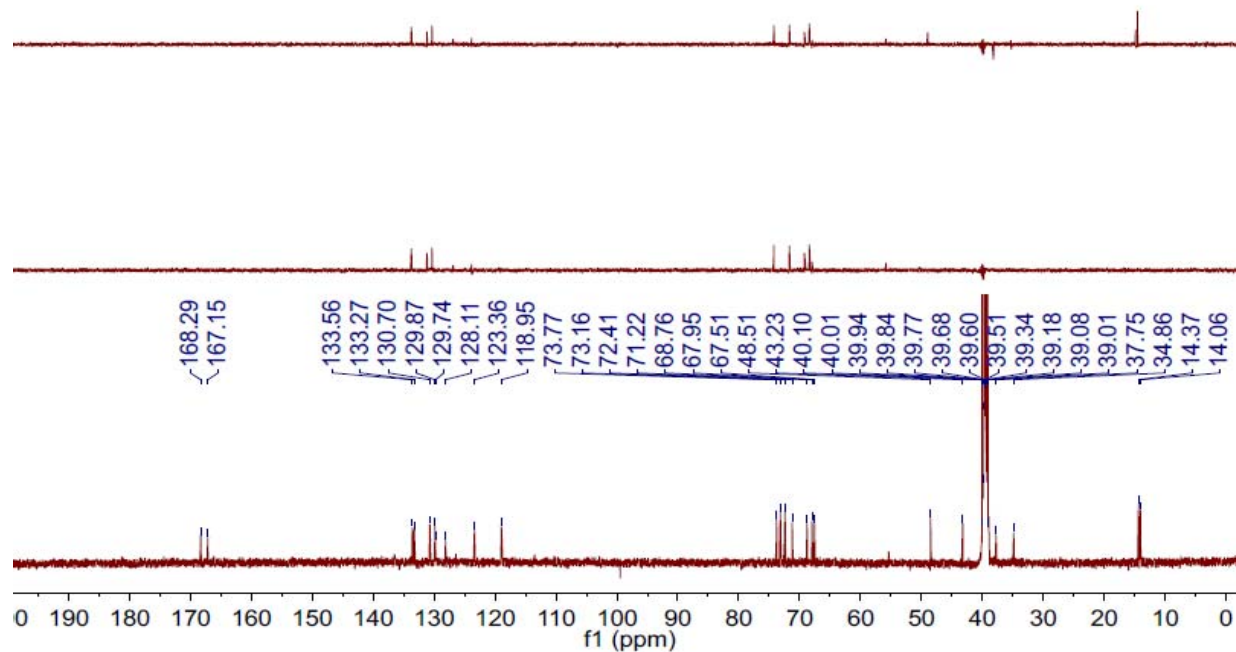Fig S22. COSY spectrum of compound **4**.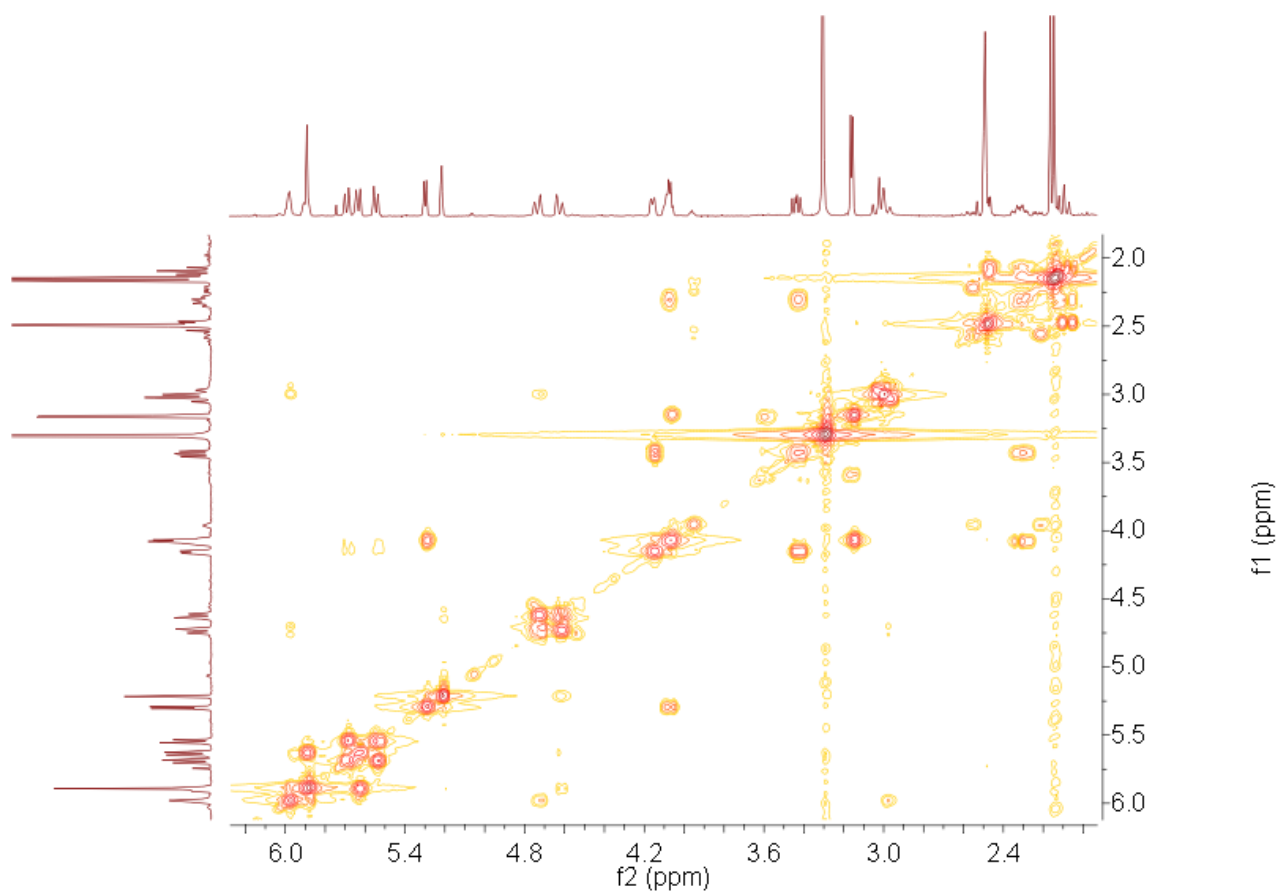

Fig S23. HSQC spectrum of compound **4**.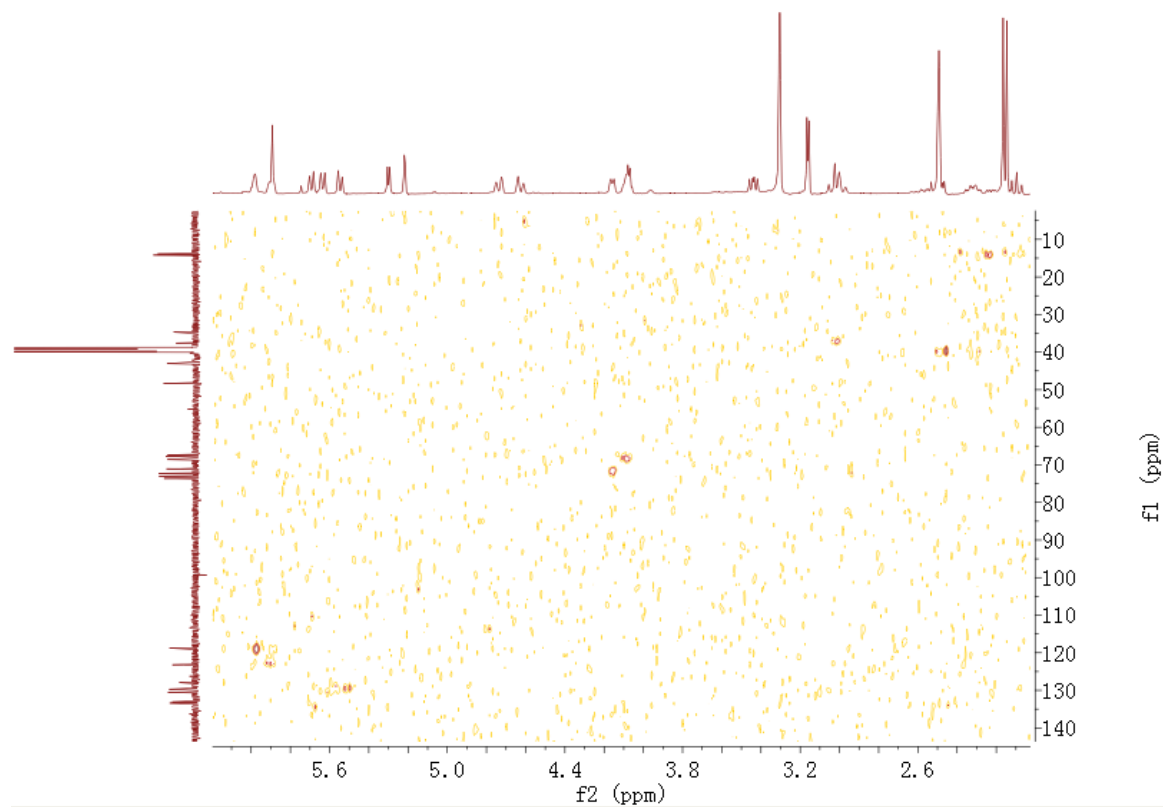Fig S24. HMBC spectrum of compound **4**.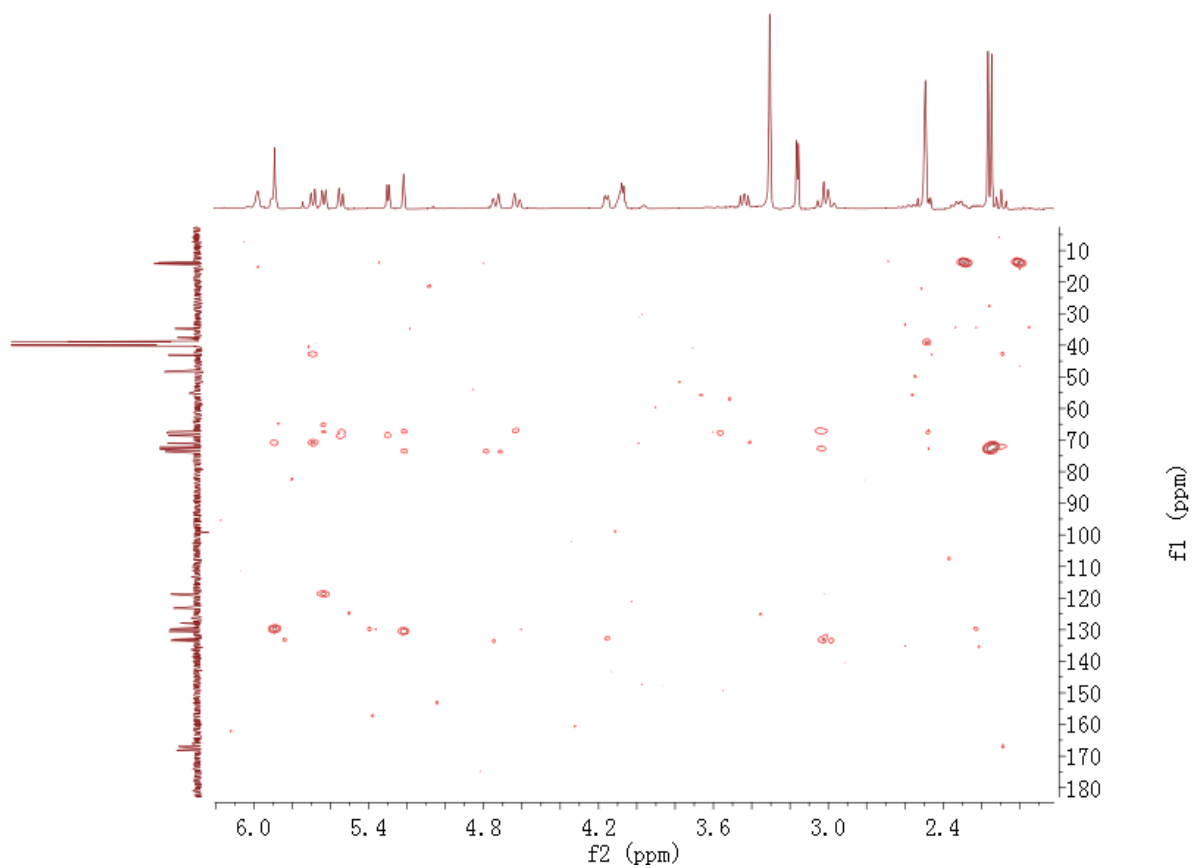

Fig S25. NOESY spectrum of compound **4**.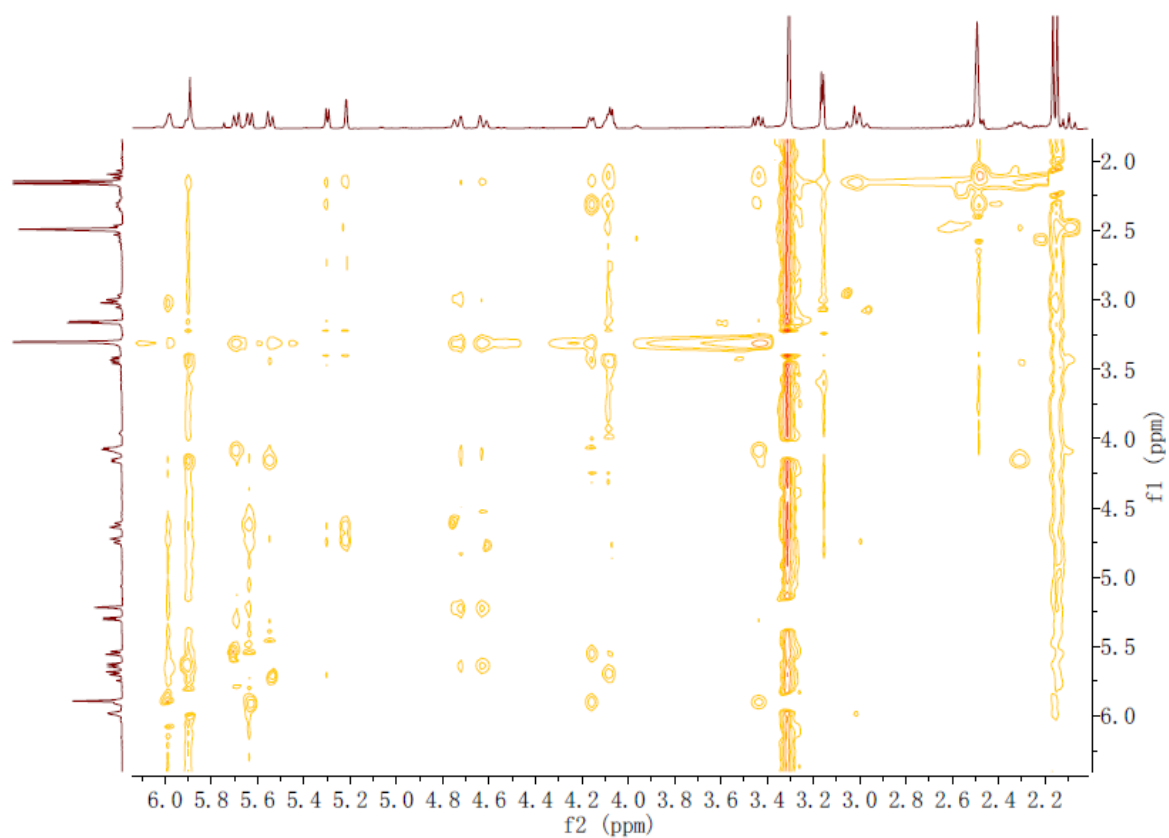Fig S26. CD spectrum of compound **4**.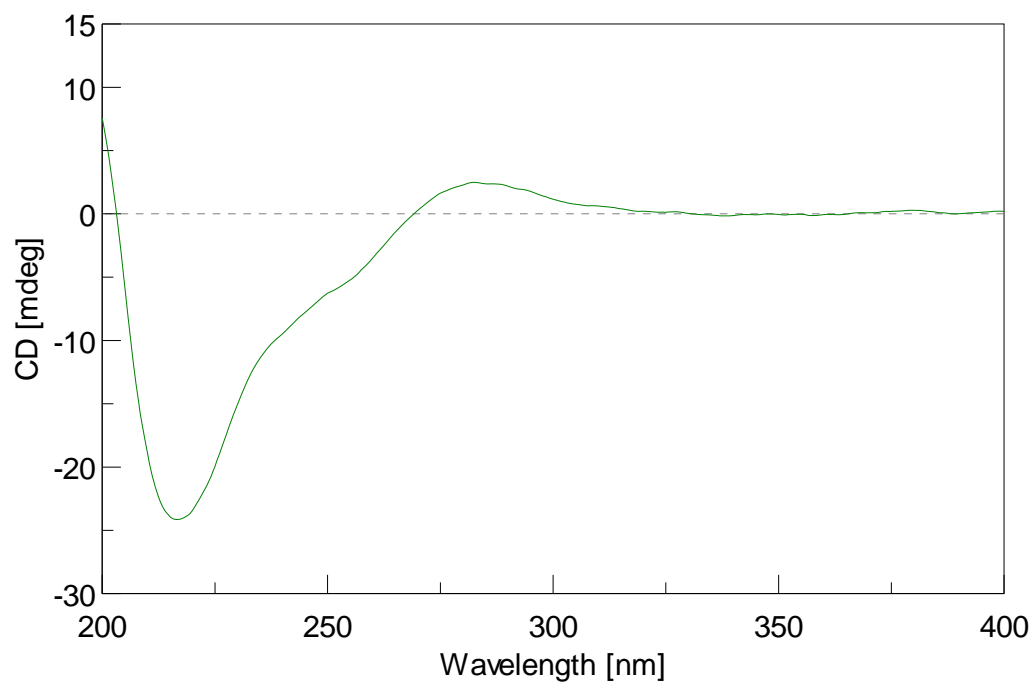

Fig S27.  $^1\text{H}$  NMR (500 MHz,  $\text{DMSO-}d_6$ ) spectrum of compound **7**.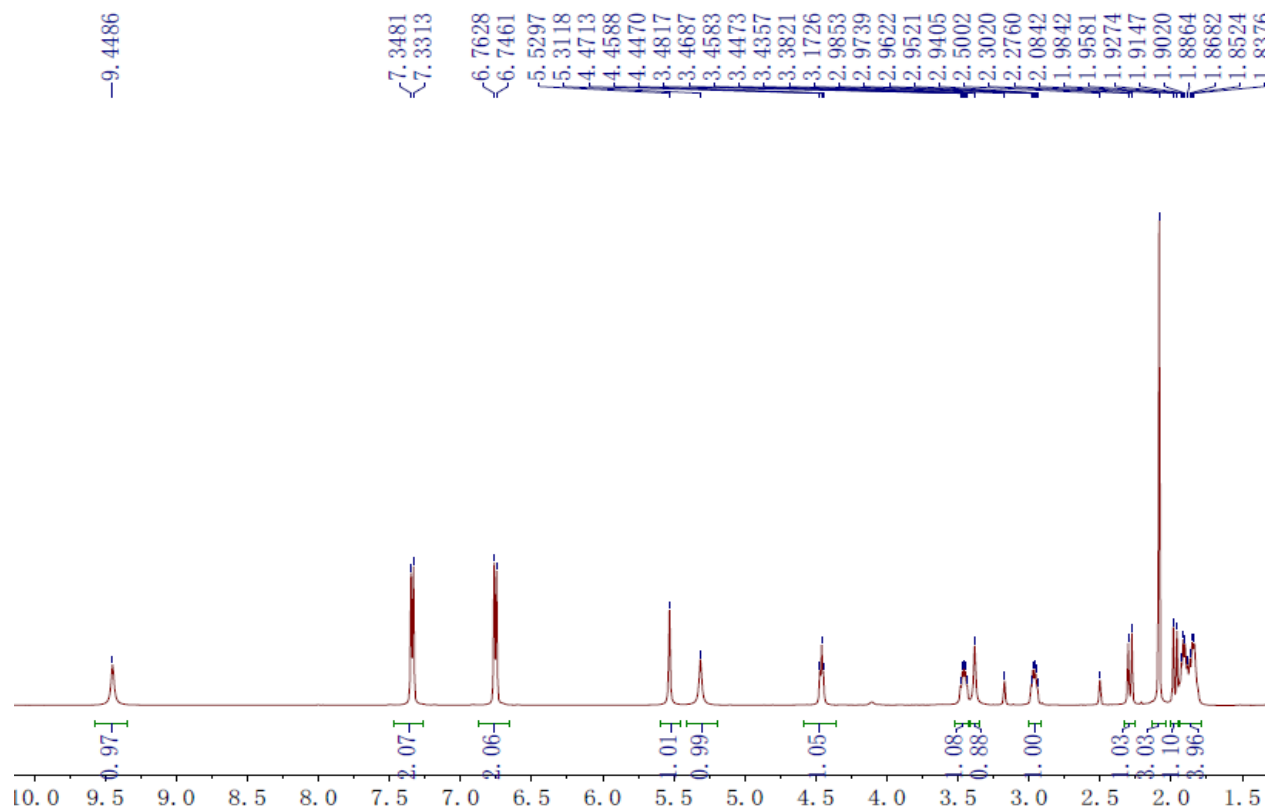Fig S28.  $^{13}\text{C}$  NMR (125 MHz,  $\text{DMSO-}d_6$ ) and DEPT spectra of compound **7**.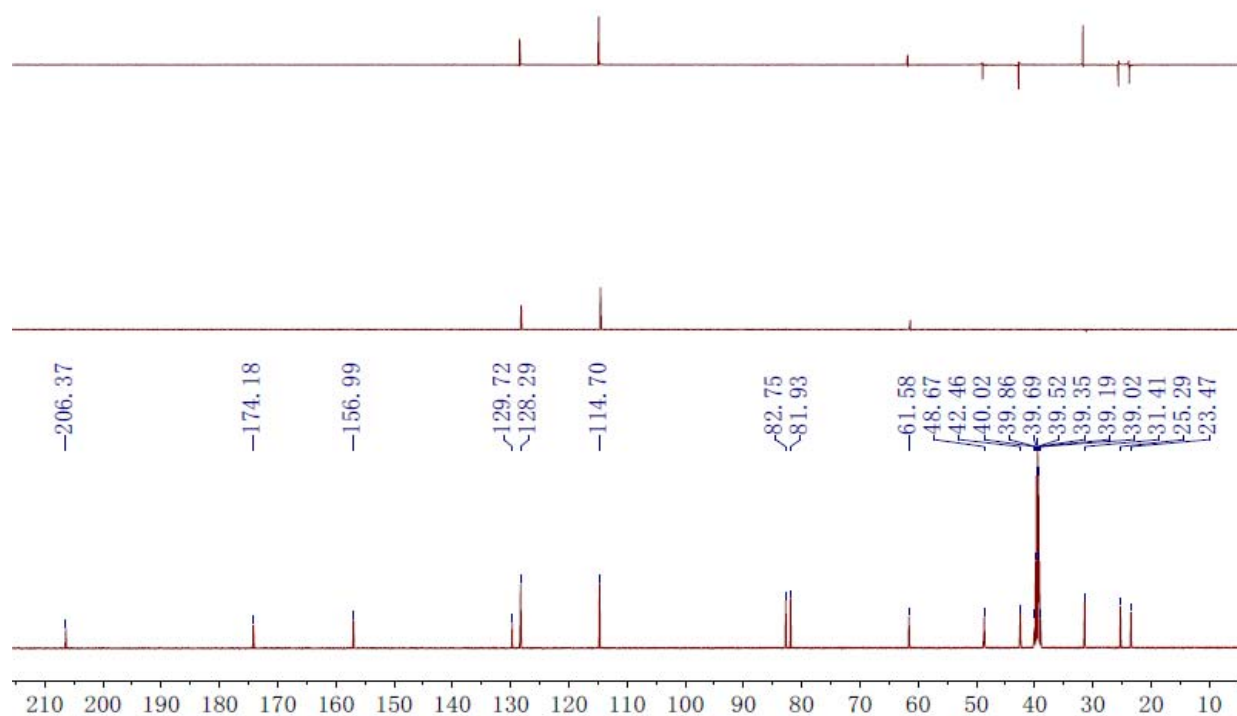



Fig S29. COSY spectrum of compound **7**.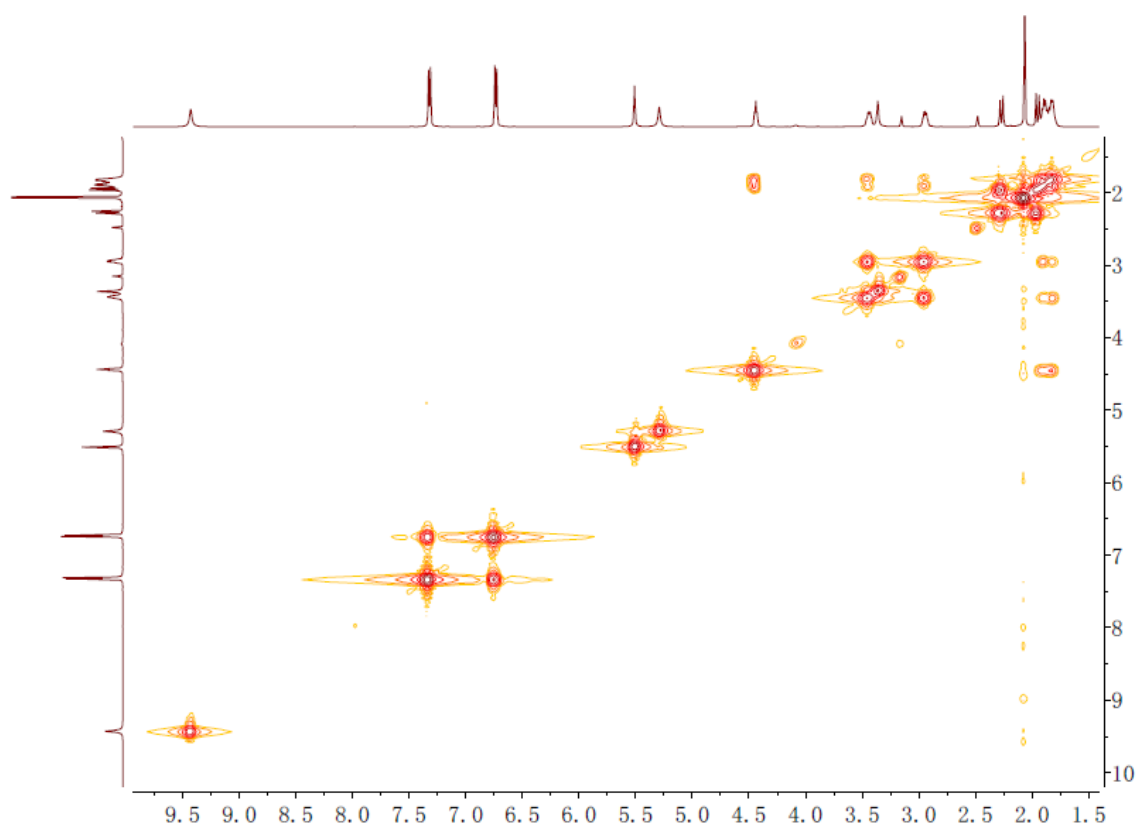Fig S30. HSQC spectrum of compound **7**.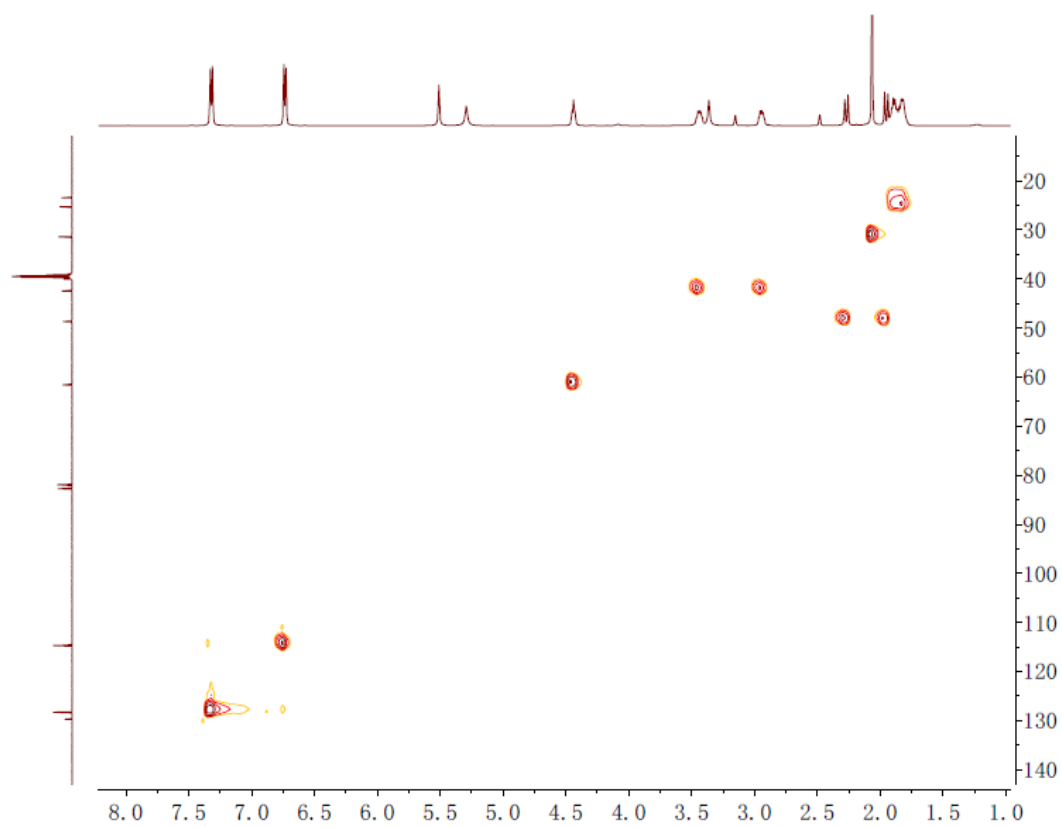

Fig S31. HMBC spectrum of compound 7.

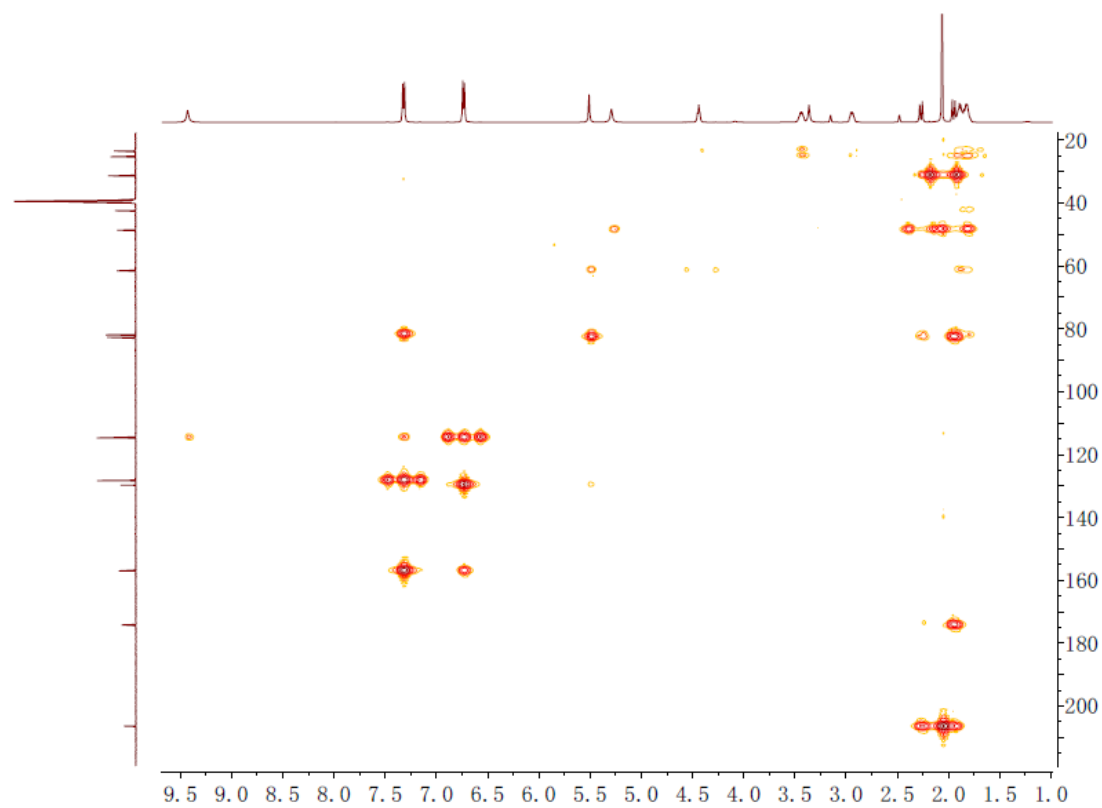

Fig S32. NOESY spectrum of compound 7.

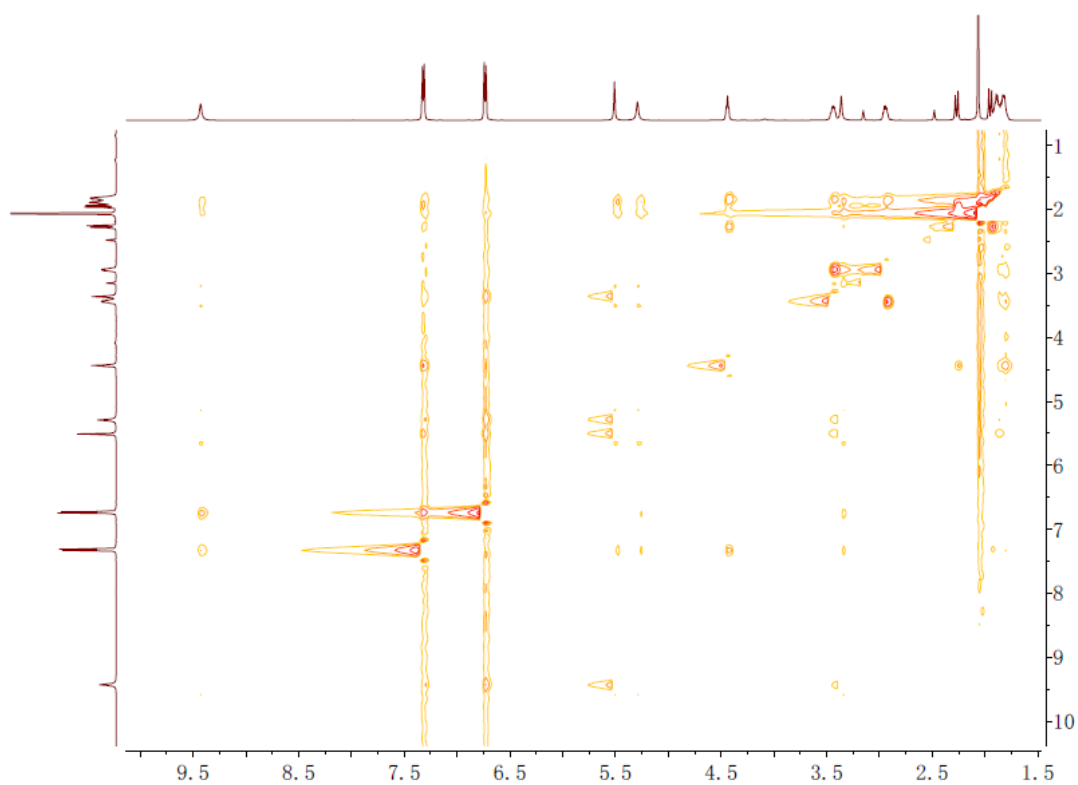

Fig S33.  $^1\text{H}$  NMR (500 MHz,  $\text{DMSO-}d_6$ ) spectrum of compound **8**.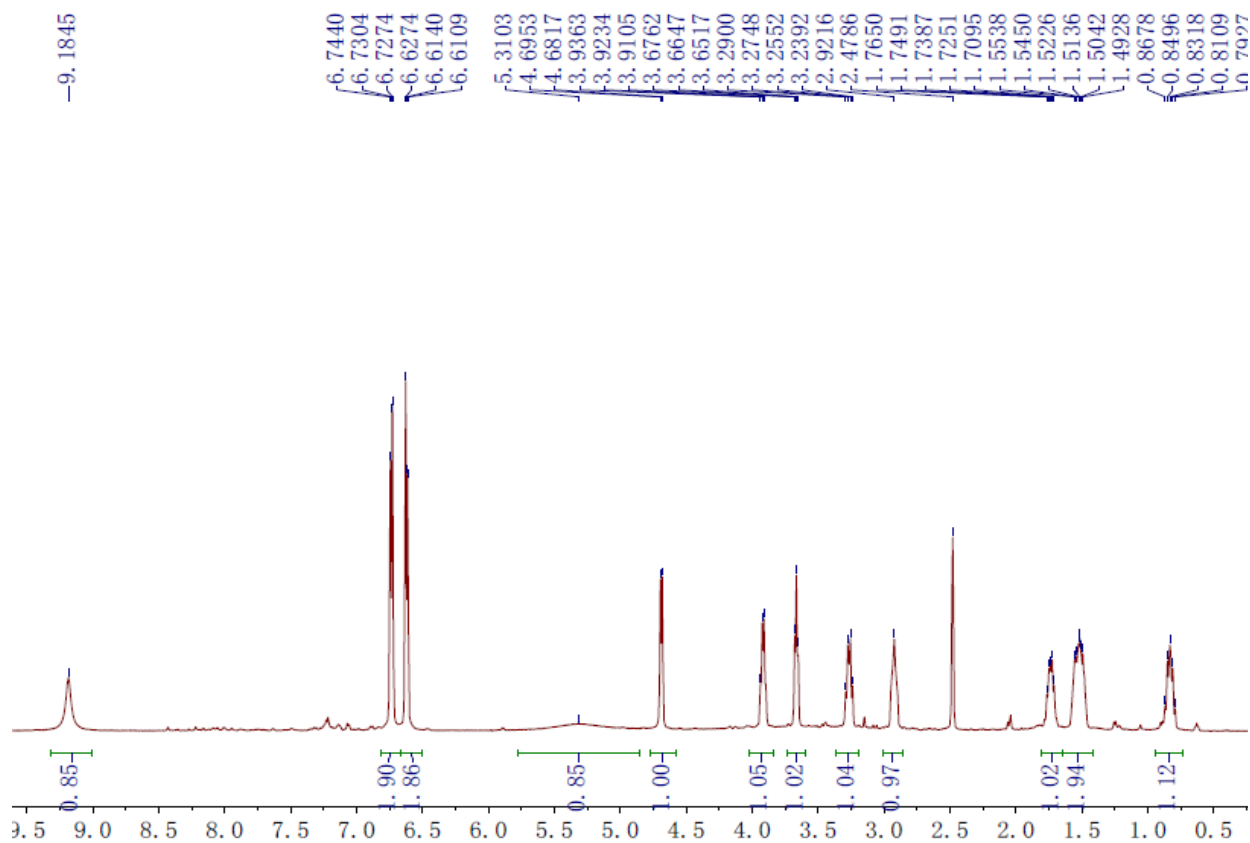Fig S34.  $^{13}\text{C}$  NMR (125 MHz,  $\text{DMSO-}d_6$ ) and DEPT spectra of compound **8**.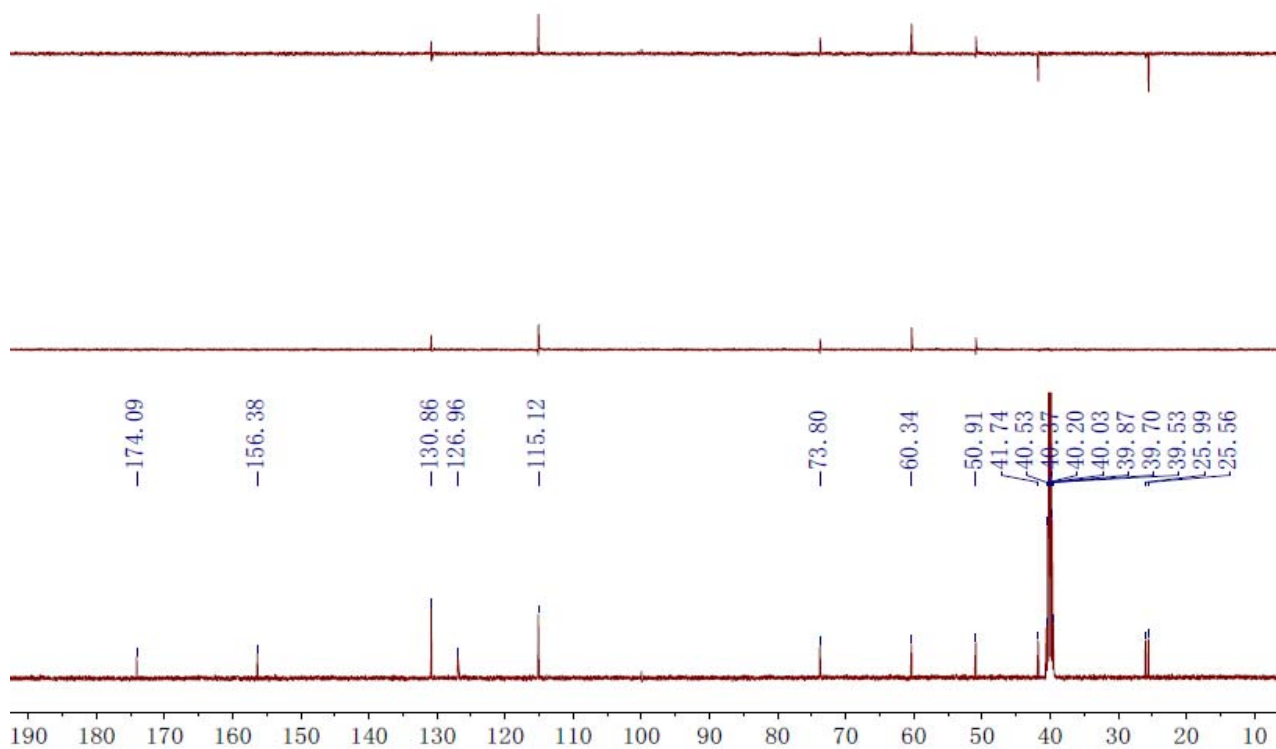

Fig S35. COSY spectrum of compound **8**.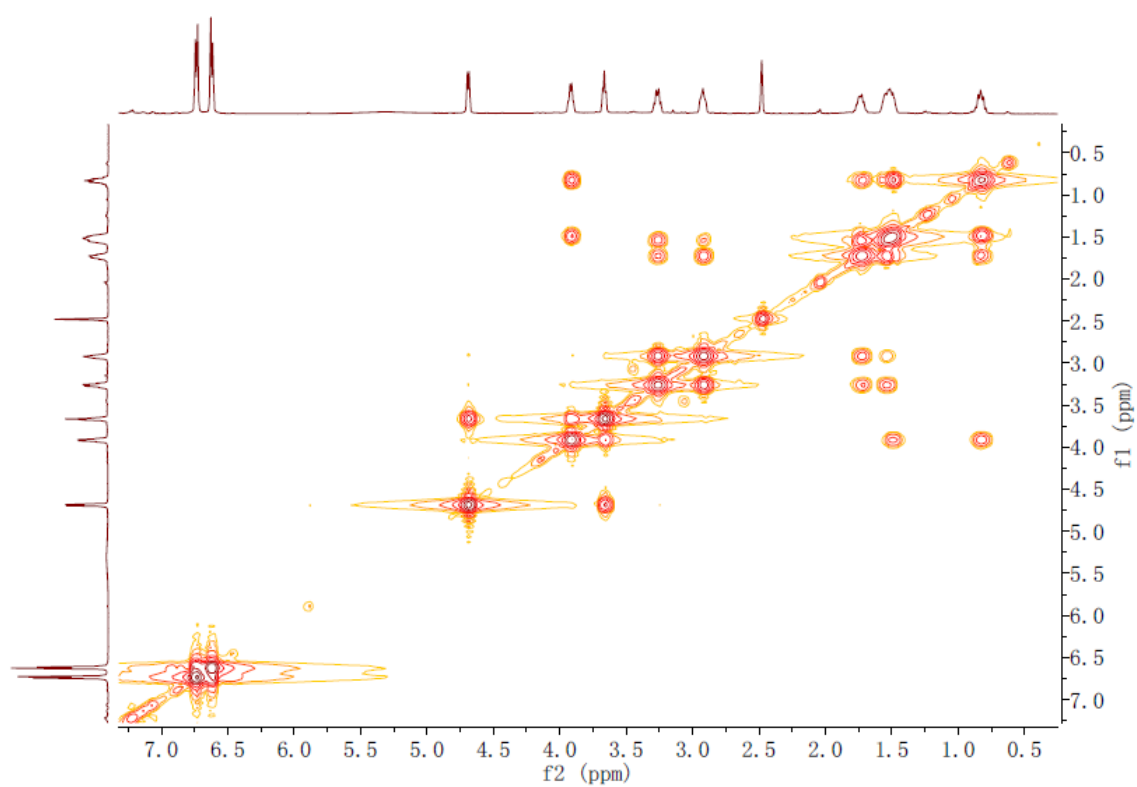Fig S36. HSQC spectrum of compound **8**.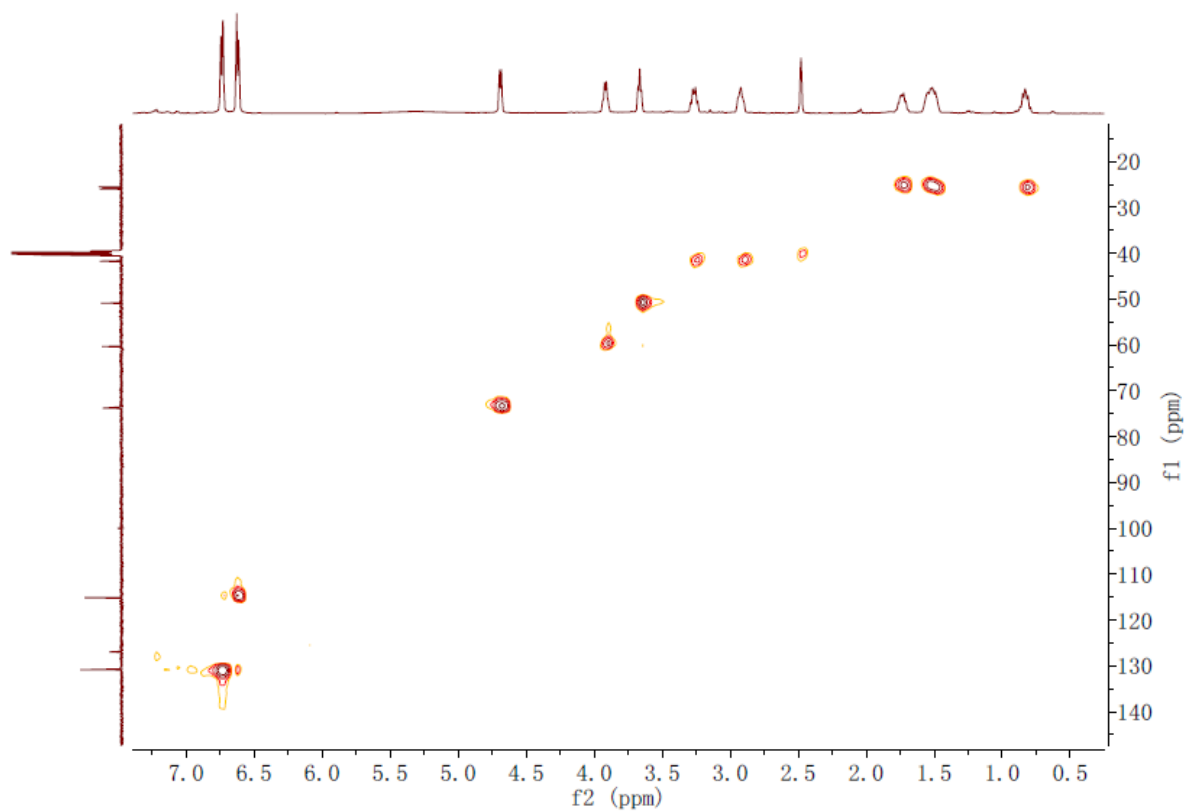

Fig S37. HMBC spectrum of compound **8**.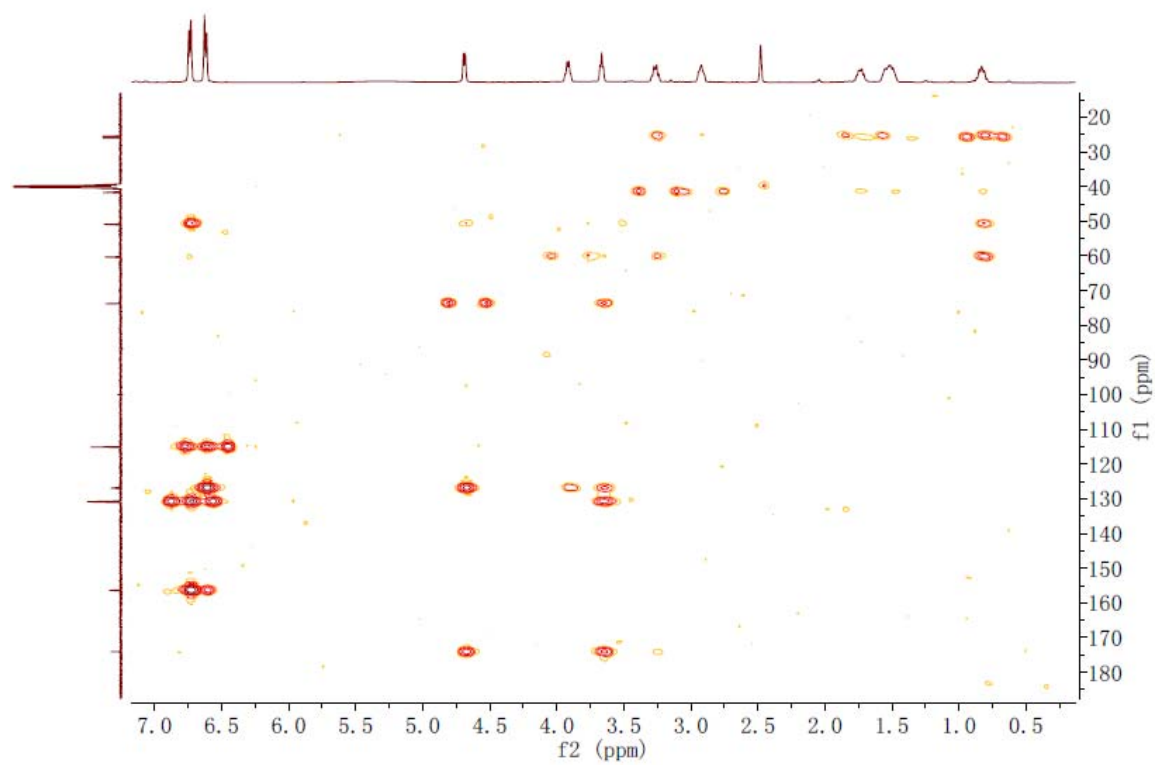Fig S38. NOESY spectrum of compound **8**.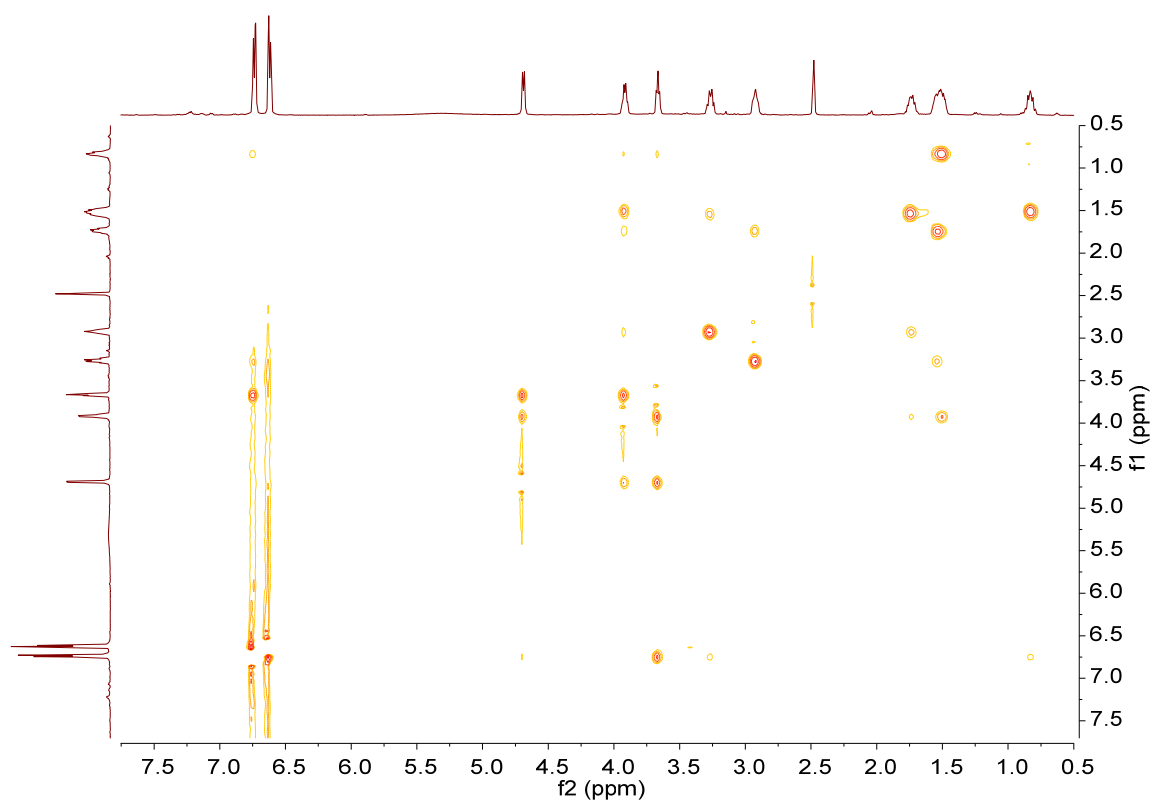

Fig S39.  $^1\text{H}$  NMR (500 MHz,  $\text{DMSO-}d_6$ ) spectrum of compound **10**.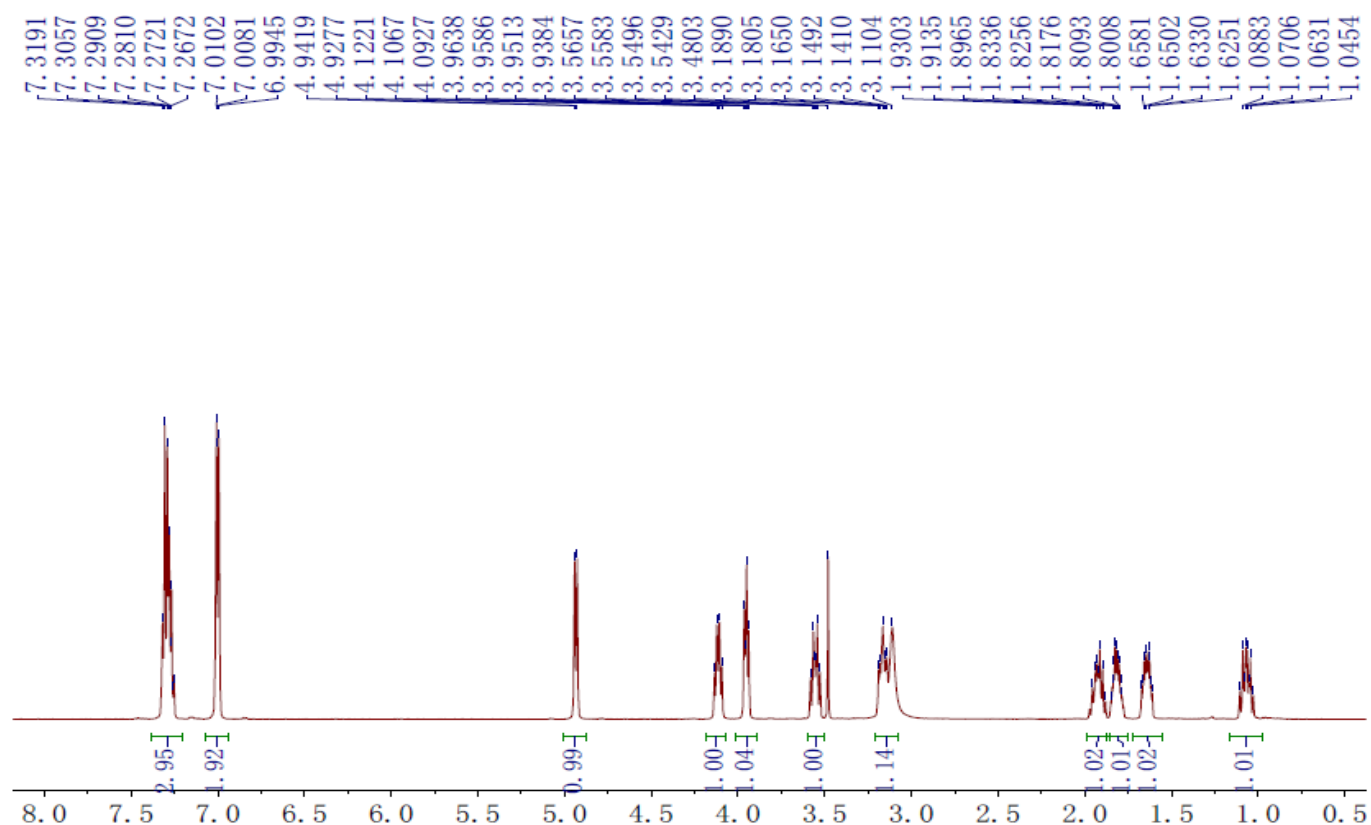Fig S40.  $^{13}\text{C}$  NMR (125 MHz,  $\text{DMSO-}d_6$ ) and DEPT spectra of compound **10**.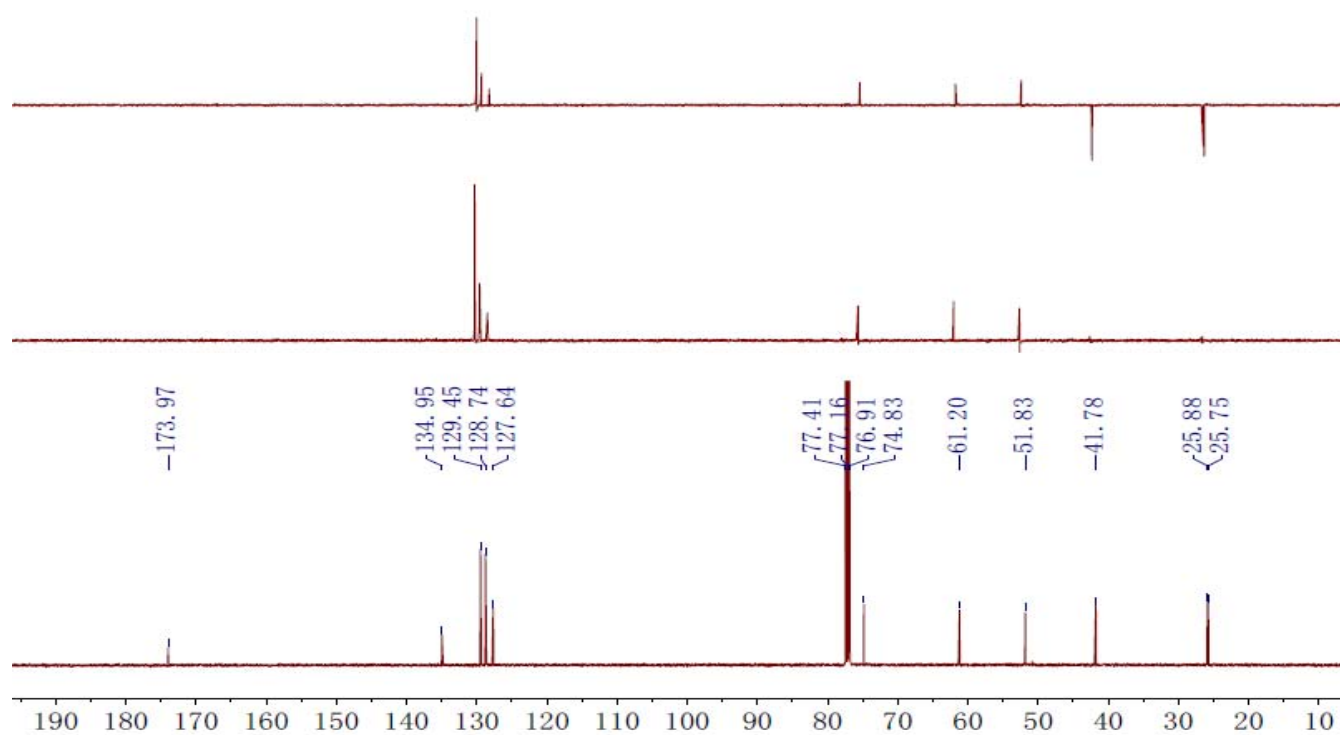

Fig S41. COSY spectrum of compound **10**.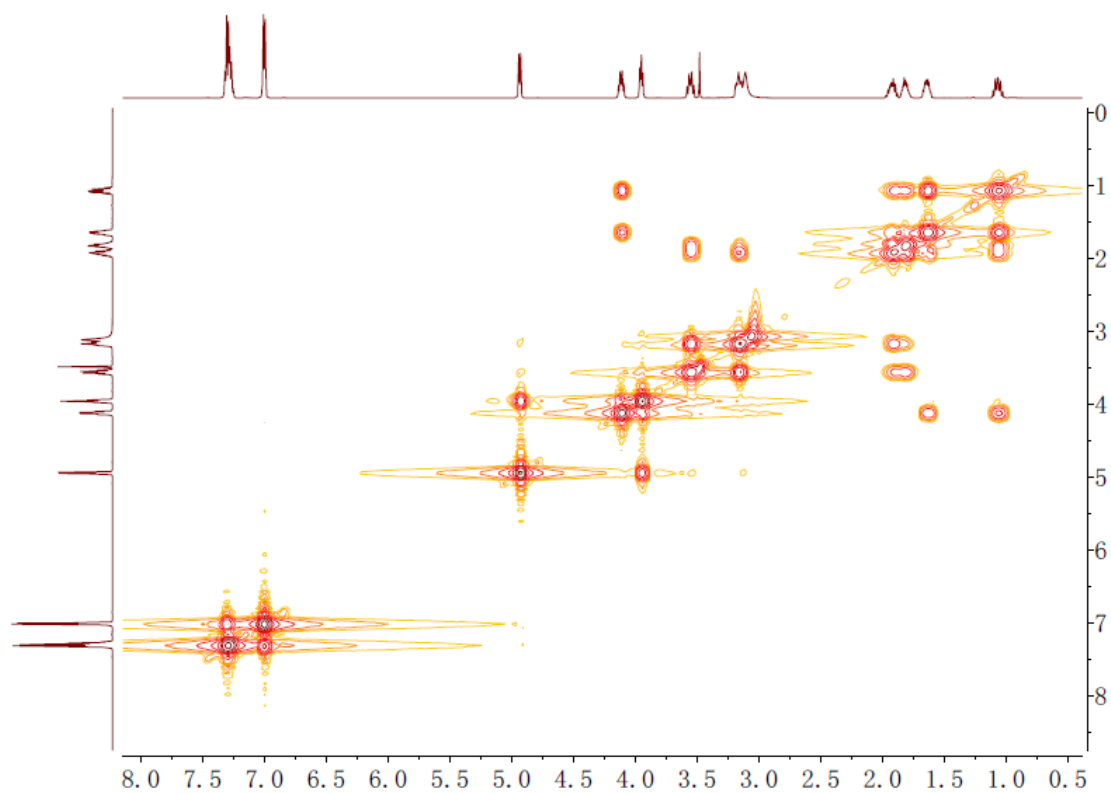Fig S42. HSQC spectrum of compound **10**.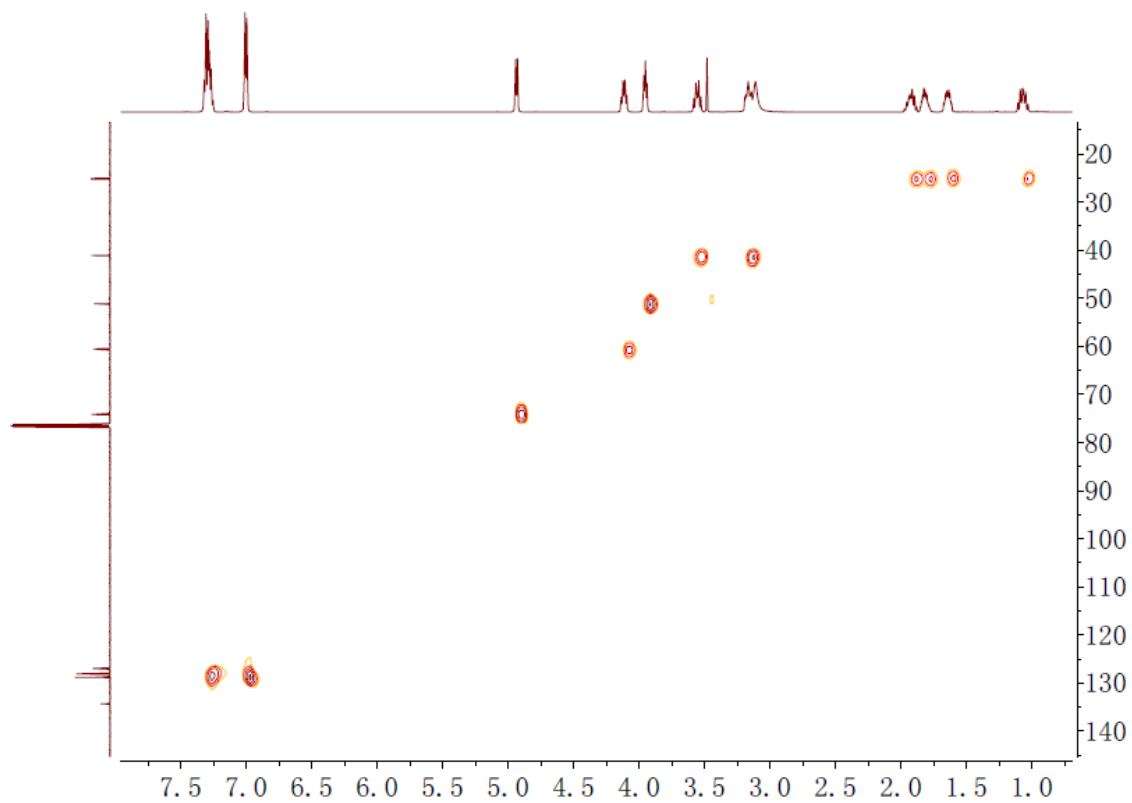

Fig S43. HMBC spectrum of compound **10**.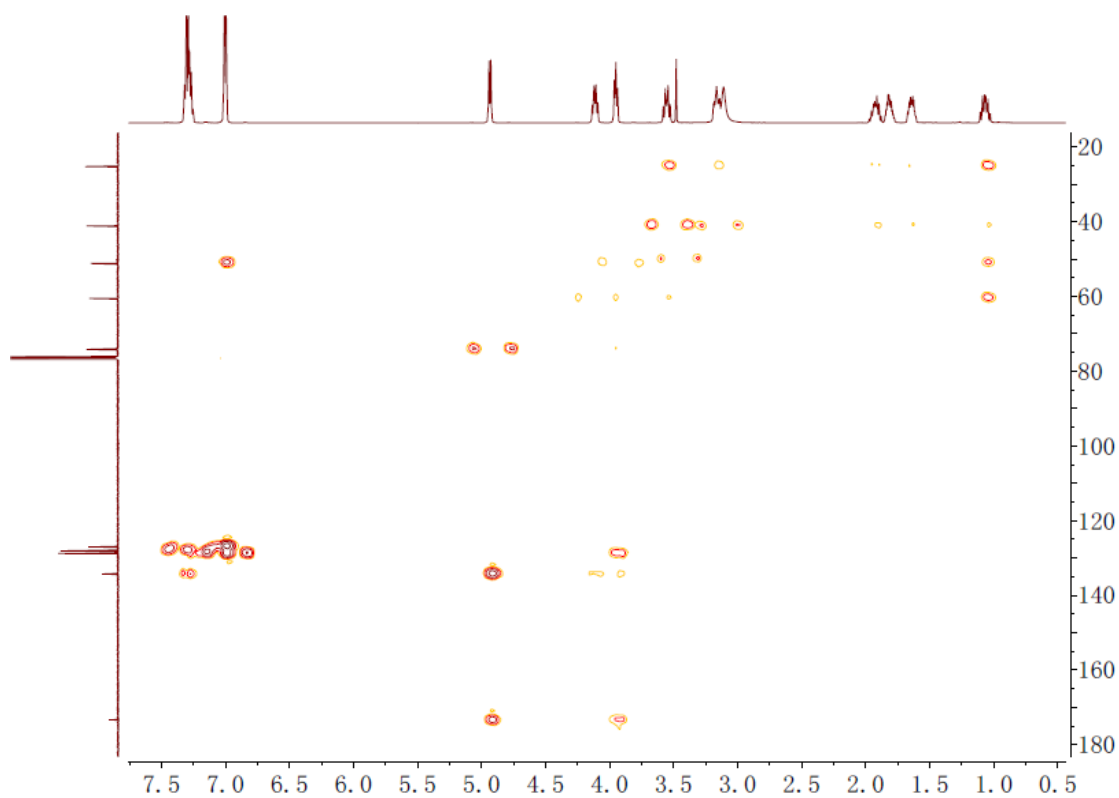Fig S44. NOESY spectrum of compound **10**.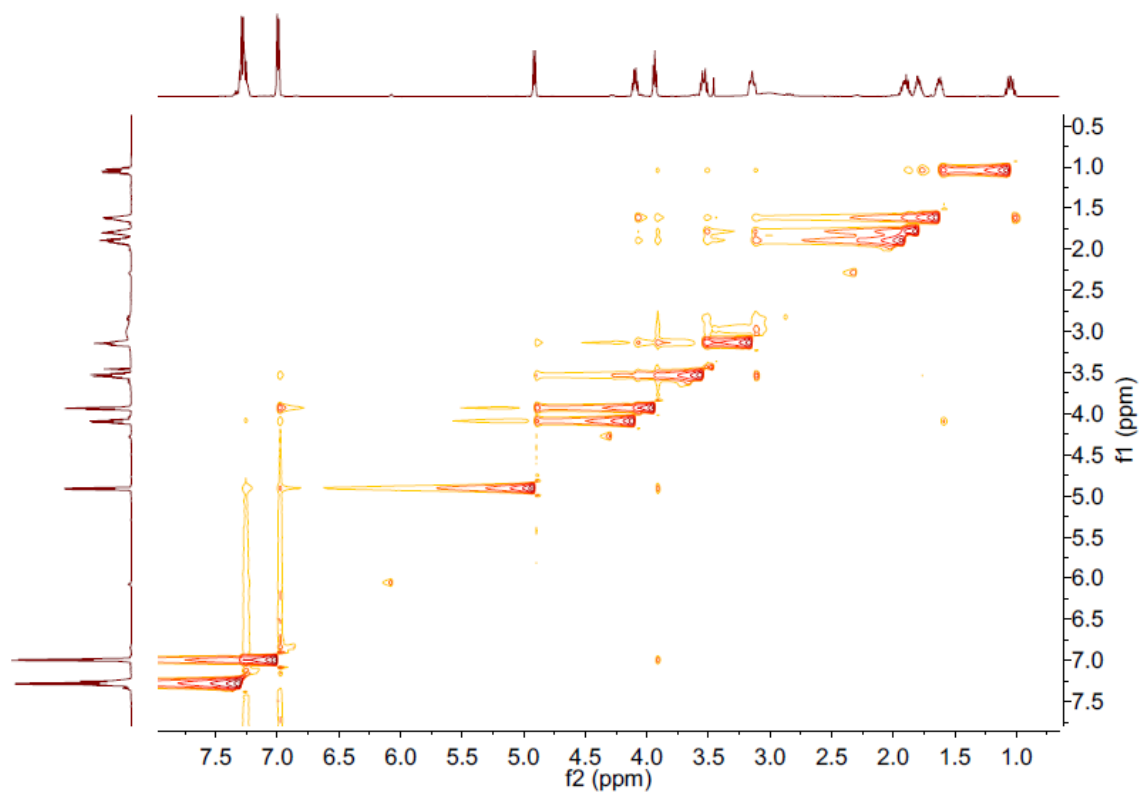



Fig S45. Crystal packing of compound **1** at 293(2) K.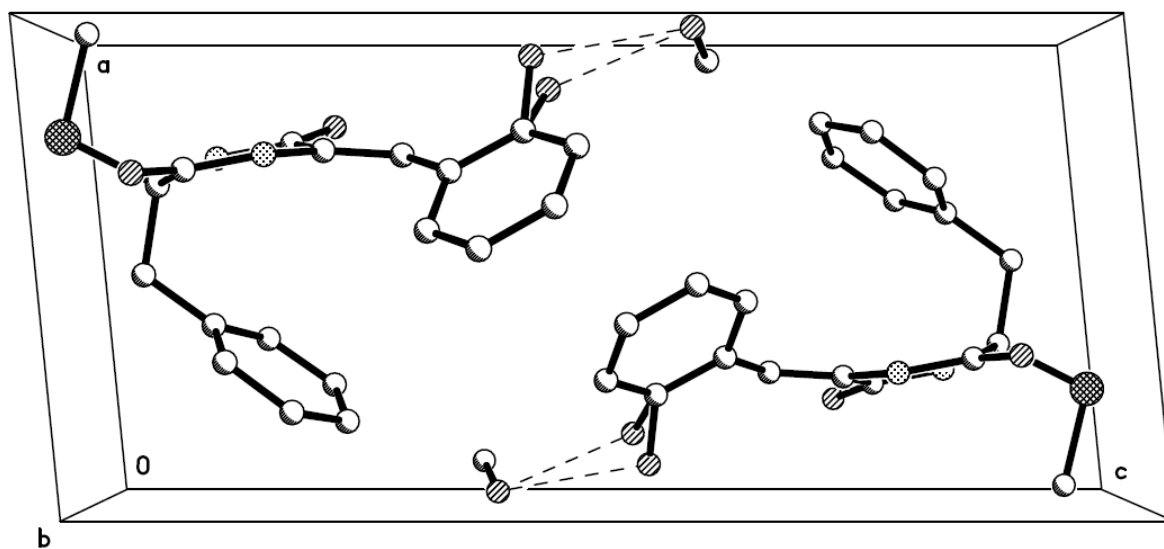Fig S46. Crystal packing of compound **2** at 293(2) K.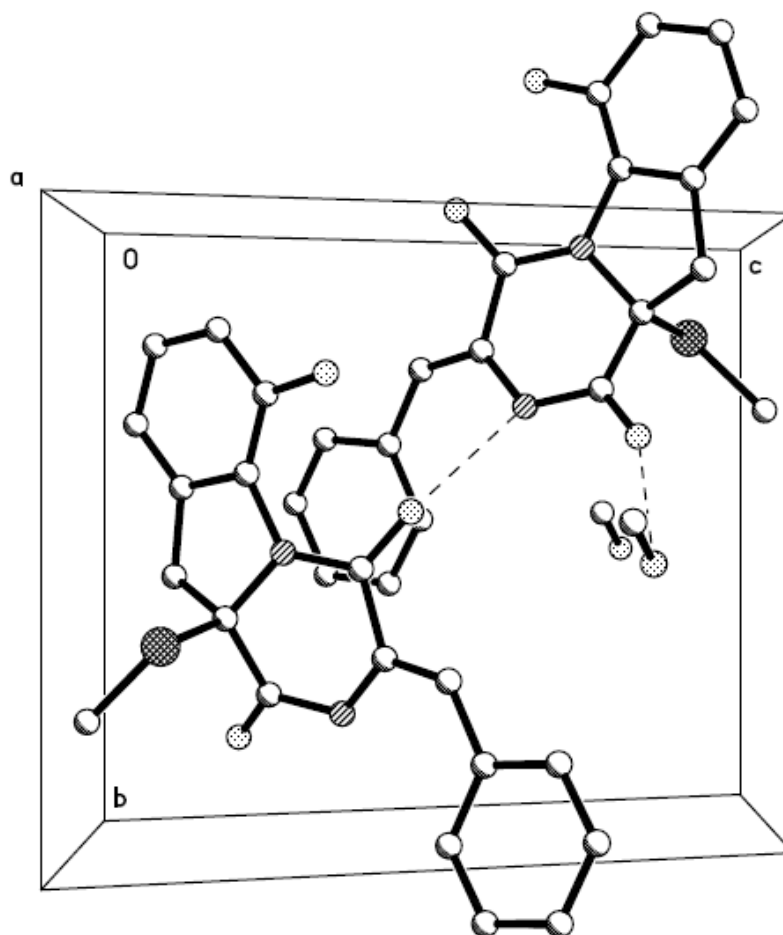

Fig S47. Crystal packing of compound **7** at 293(2) K.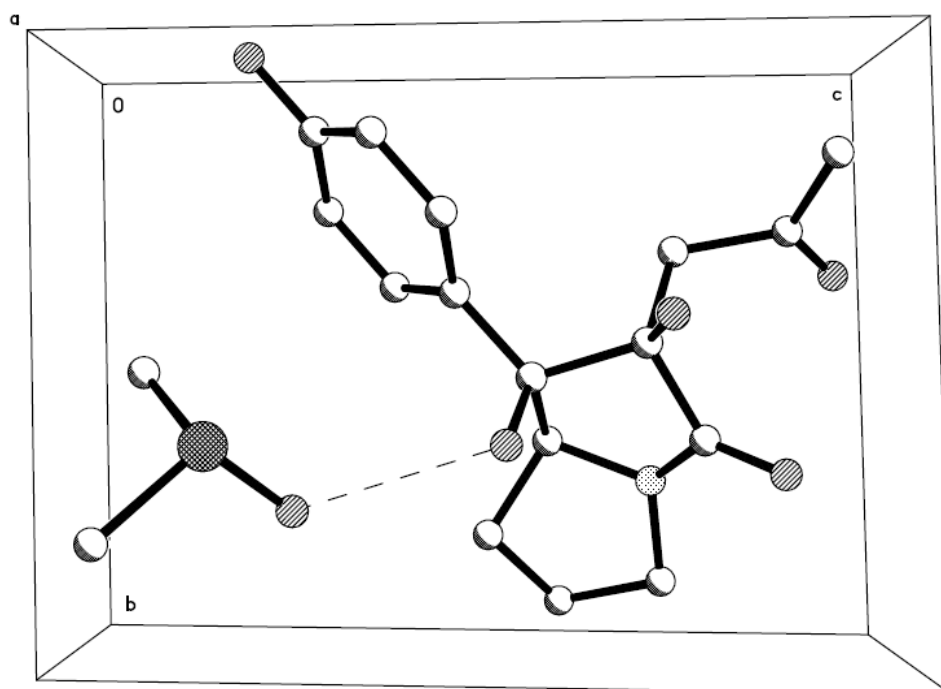Fig S48. Crystal packing of compound **8** at 293(2) K.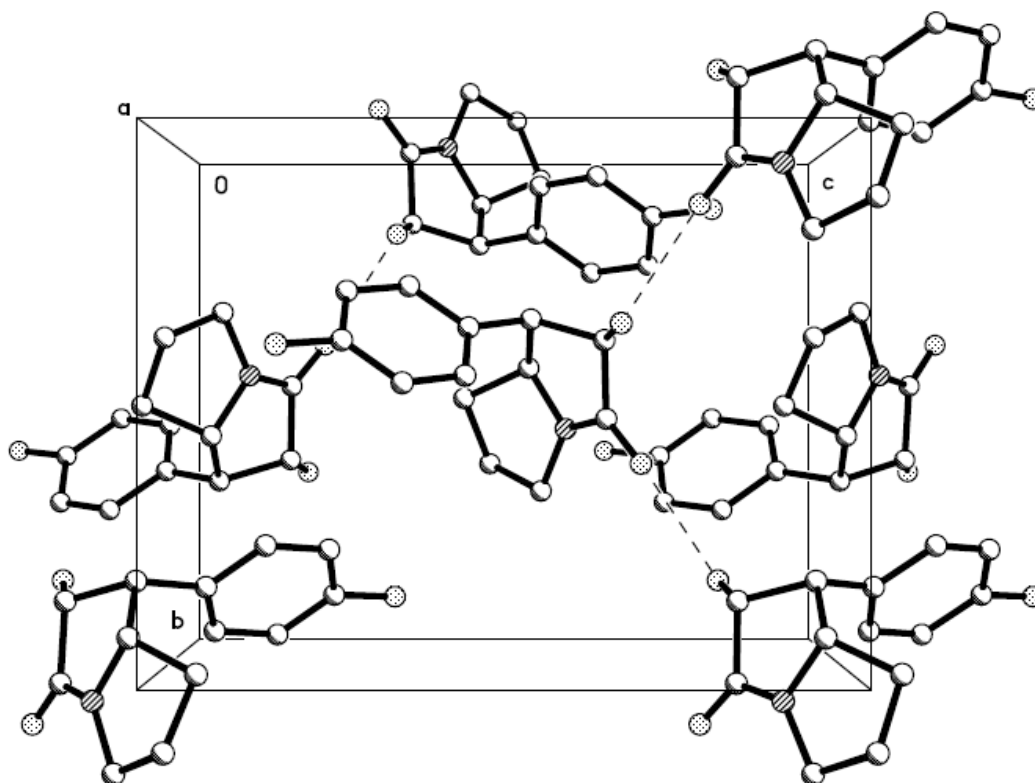

Supplement: c7ra12081h1.pdf [file c7ra12081h1.pdf]
